# Supplementary material for: The plant mobile domain proteins MAIN and MAIL1 interact with the phosphatase PP7L to regulate gene expression and silence transposable elements in Arabidopsis thaliana
Source: PLoS Genet. 2020 Apr 14;16(4):e1008324. doi: 10.1371/journal.pgen.1008324 (PMC7156037; doi:10.1371/journal.pgen.1008324)
Supplement: S13 Table — (XLSX) [file pgen.1008324.s019.xlsx]

## Sheet: fig 1D
Primers	Sample	Cp	Mean Cp
RHIP1	WT	24.45	24.4733
	WT	24.53
	WT	24.44
	WT	24.55	24.59
	WT	24.66
	WT	24.56
	WT	24.99	24.9667
	WT	24.94
	WT	24.97
	ddc	24.21	24.17
	ddc	24.19
	ddc	24.11
	ddc	25.75	25.4733
	ddc	25.32
	ddc	25.35
	ddc	24.13	24.15
	ddc	24.19
	ddc	24.13
	ddc#16	24.54	24.5233
	ddc#16	24.52
	ddc#16	24.51
	ddc#16	23.81	23.7967
	ddc#16	23.79
	ddc#16	23.79
	ddc#16	24.26	24.2467
	ddc#16	24.24
	ddc#16	24.24		∂	∂∂	fold change	mean fc	mean norm	sdt dev	sdt dev norm
AtCOPIA28	WT	29.74	30.195	5.72167	0	1	0.874588	1	0.189404	0.216564
	WT	30.3
	WT	30.09
	WT	30.15	30.36	5.77	0.0483333	0.967053
	WT	30.29
	WT	30.64
	WT	31.44	31.295	6.32833	0.606667	0.656712
	WT	31.15
	WT	30.62
	ddc	27.08	27.0967	2.92667	-2.795	6.94031	7.60381	8.69416	0.574612	0.657009
	ddc	27.14
	ddc	27.07
	ddc	28.22	28.2067	2.73333	-2.98833	7.93557
	ddc	28.35
	ddc	28.05
	ddc	26.97	26.8833	2.73333	-2.98833	7.93557
	ddc	26.89
	ddc	26.79
	ddc#16	20.08	20.06	-4.46333	-10.185	1164.1	1073.29	1227.19	96.4047	110.229
	ddc#16	20.06
	ddc#16	20.04
	ddc#16	19.62	19.5933	-4.20333	-9.925	972.126
	ddc#16	19.59
	ddc#16	19.57
	ddc#16	19.95	19.8867	-4.36	-10.0817	1083.64
	ddc#16	19.88
	ddc#16	19.83
GFP	WT	31.48	31.4633	6.99	0	1	1.03783	1	0.336379	0.324118
	WT	31.44
	WT	31.47
	WT	32.12	32.05	7.46	0.47	0.721965
	WT	32.25
	WT	31.78
	WT	33.83	31.48	6.51333	-0.476667	1.39152
	WT	31.52
	WT	31.44
	ddc	22.01	21.7233	-2.44667	-9.43667	692.978	770.963	742.86	78.1228	75.2751
	ddc	21.58
	ddc	21.58
	ddc	23.06	22.8733	-2.6	-9.59	770.686
	ddc	22.88
	ddc	22.68
	ddc	21.81	21.41	-2.74	-9.73	849.223
	ddc	21.22
	ddc	21.2
	ddc#16	20.22	20.27	-4.25333	-11.2433	2424.27	2448.81	2359.55	33.2644	32.0519
	ddc#16	20.29
	ddc#16	20.3
	ddc#16	19.48	19.5067	-4.29	-11.28	2486.67
	ddc#16	19.53
	ddc#16	19.51
	ddc#16	19.88	19.9867	-4.26	-11.25	2435.5
	ddc#16	20.01
	ddc#16	20.07
ROMANIAT5	WT	34.01	34.98	10.5067	0	1	1.29706	1	0.64092	0.494133
	WT	37.27
	WT	33.66
	WT	34.03	34.0733	9.48333	-1.02333	2.03261
	WT	34.18
	WT	34.01
	WT	35.45	35.6933	10.7267	0.22	0.858565
	WT	36.86
	WT	34.77
	ddc	29.69	29.7967	5.62667	-4.88	29.446	20.4471	15.7642	8.72968	6.73037
	ddc	29.74
	ddc	29.96
	ddc	32.72	32.3933	6.92	-3.58667	12.0142
	ddc	32.44
	ddc	32.02
	ddc	30.23	30.3433	6.19333	-4.31333	19.8812
	ddc	30.47
	ddc	30.33
	ddc#16	24.44	24.4733	-0.05	-10.5567	1506.17	1173.02	904.369	538.895	415.474
	ddc#16	24.46
	ddc#16	24.52
	ddc#16	25.21	25.1967	1.4	-9.10667	551.29
	ddc#16	25.27
	ddc#16	25.11
	ddc#16	24.26	24.24	-0.00666667	-10.5133	1461.6
	ddc#16	24.22
	ddc#16	24.08
AtMu1	WT	29.06	29.0833	4.61	0	1	0.891895	1	0.151576	0.169948
	WT	29.1
	WT	29.09
	WT	29.14	29.2633	4.67333	0.0633333	0.95705
	WT	29.46
	WT	29.19
	WT	29.99	30.0533	5.08667	0.476667	0.718636
	WT	30.07
	WT	30.1
	ddc	25.86	25.9167	1.74667	-2.86333	7.27695	7.70151	8.63499	0.607774	0.681441
	ddc	25.93
	ddc	25.96
	ddc	26.94	27.0133	1.54	-3.07	8.39773
	ddc	27.04
	ddc	27.06
	ddc	25.84	25.8667	1.71667	-2.89333	7.42985
	ddc	25.88
	ddc	25.88
	ddc#16	20.9	20.8767	-3.64667	-8.25667	305.847	302.064	338.677	13.2346	14.8388
	ddc#16	20.96
	ddc#16	20.77
	ddc#16	20.15	20.1167	-3.68	-8.29	312.996
	ddc#16	20.2
	ddc#16	20
	ddc#16	20.75	20.69	-3.55667	-8.16667	287.35
	ddc#16	20.7
	ddc#16	20.62

## Sheet: fig 2F-G
Experiment: exp3958 Selected Filter: SYBR Green I / HRM Dye (465-510)
Include	Color	Pos	Name	Cp	RHIP1	Status
True	255	B2	Sample 1	23.28	23.16	1	WT
True	255	B3	Sample 2	23.21
True	255	B4	Sample 3	22.99
True	255	B5	Sample 4	22.84	22.6767	2
True	255	B6	Sample 5	22.74
True	255	B7	Sample 6	22.45
True	255	B8	Sample 7	22.25	22.33	3
True	255	B9	Sample 8	22.61
True	255	B10	Sample 9	22.13
True	255	B11	Sample 10	22.08	22.2033	1	ddc
True	255	B12	Sample 11	22.27
True	255	B13	Sample 12	22.26
True	255	B14	Sample 13	22.67	22.71	2
True	255	B15	Sample 14	22.71
True	255	B16	Sample 15	22.75
True	255	B17	Sample 16	22.93	23.0633	3
True	255	B18	Sample 17	23.31
True	255	B19	Sample 18	22.95
True	255	C2	Sample 19	22.69	22.7833	1	main-3
True	255	C3	Sample 20	22.86
True	255	C4	Sample 21	22.8
True	255	C5	Sample 22	22.96	22.5867	2
True	255	C6	Sample 23	22.61
True	255	C7	Sample 24	22.19
True	255	C8	Sample 25	21.89	21.93	3
True	255	C9	Sample 26	22.18
True	255	C10	Sample 27	21.72
True	255	C11	Sample 28	22.3	22.4067	1	ddc main-3
True	255	C12	Sample 29	22.09
True	255	C13	Sample 30	22.83
True	255	C14	Sample 31	22.15	22.5433	2
True	255	C15	Sample 32	22.79
True	255	C16	Sample 33	22.69
True	255	C17	Sample 34	22.91	22.6133	3
True	255	C18	Sample 35	22.2
True	255	C19	Sample 36	22.73
True	255	D2	Sample 37	23.28	23.2133	1	cmt3 main-3
True	255	D3	Sample 38	23.14
True	255	D4	Sample 39	23.22
True	255	D5	Sample 40	22.61	22.7067	2
True	255	D6	Sample 41	23
True	255	D7	Sample 42	22.51
True	255	D8	Sample 43	22.22	22.6	3
True	255	D9	Sample 44	22.98
True	255	D10	Sample 45	23.59
True	255	D11	Sample 46	22.03	22.3067	1	dd main-3
True	255	D12	Sample 47	22.44
True	255	D13	Sample 48	22.45
True	255	D14	Sample 49	23.46	22.66	2
True	255	D15	Sample 50	22.81
True	255	D16	Sample 51	22.51
True	255	D17	Sample 52	23.27	23.385	3
True	255	D18	Sample 53	23.5
True	255	D19	Sample 54	22.2
Include	Color	Pos	Name	Cp	ATCOPIA28	Concentration	Status						RHIP1	ATCOPIA28	∂	∂∂		mean	normalized mean	std dev	normalized std dev		ATCOPIA28	normalized mean	normalized std dev
True	255	F2	Sample 1	33.3	33.27	1	WT				1	WT	23.16	33.27	10.11	0	1	1.93649	1	1.00152	0.517181			1	0.517181
True	255	F3	Sample 2	33.22																				178.905	82.9228
True	255	F4	Sample 3	33.29																				37.1136	18.496
True	255	F5	Sample 4	31.25	31.0533	2					2		22.6767	31.0533	8.37667	-1.73333	3.32495							16380.3	4021.33
True	255	F6	Sample 5	30.89																				221.539	53.0127
True	255	F7	Sample 6	31.02																				3678.13	600.053
True	255	F8	Sample 7	32.29	31.87	3					3		22.33	31.87	9.54	-0.57	1.48452
True	255	F9	Sample 8	32.05
True	255	F10	Sample 9	31.27
True	255	F11	Sample 10	24.48	24.4967	1	ddc				4	ddc	22.2033	24.4967	2.29333	-7.81667	225.45	346.448	178.905	160.579	82.9228
True	255	F12	Sample 11	24.69
True	255	F13	Sample 12	24.32
True	255	F14	Sample 13	25.11	24.91	2					5		22.71	24.91	2.2	-7.91	240.518
True	255	F15	Sample 14	24.66
True	255	F16	Sample 15	24.96
True	255	F17	Sample 16	24.14	24.01	3					6		23.0633	24.01	0.946667	-9.16333	573.374
True	255	F18	Sample 17	23.9
True	255	F19	Sample 18	23.99
True	255	G2	Sample 19	27.02	27.06	1	main-3				7	main-3	22.7833	27.06	4.27667	-5.83333	57.0175	71.8702	37.1136	35.8173	18.496
True	255	G3	Sample 20	27.16
True	255	G4	Sample 21	27
True	255	G5	Sample 22	25.91	25.775	2					8		22.5867	25.775	3.18833	-6.92167	121.235
True	255	G6	Sample 23	26.48
True	255	G7	Sample 24	25.64
True	255	G8	Sample 25	26.78	26.8167	3					9		21.93	26.8167	4.88667	-5.22333	37.3577
True	255	G9	Sample 26	26.89
True	255	G10	Sample 27	26.78
True	255	G11	Sample 28	17.03	17.14	1	ddc main-3				10	ddc main-3	22.4067	17.14	-5.26667	-15.3767	42544	31720.3	16380.3	7787.28	4021.33
True	255	G12	Sample 29	17.09
True	255	G13	Sample 30	17.3
True	255	G14	Sample 31	17.43	18.07	2					11		22.5433	18.07	-4.47333	-14.5833	24548.3
True	255	G15	Sample 32	18.01
True	255	G16	Sample 33	18.13
True	255	G17	Sample 34	18.09	17.9467	3					12		22.6133	17.9467	-4.66667	-14.7767	28068.5
True	255	G18	Sample 35	17.88
True	255	G19	Sample 36	17.87
True	255	H2	Sample 37	24.82	24.6533	1	cmt3 main-3				13	cmt3 main-3	23.2133	24.6533	1.44	-8.67	407.315	429.009	221.539	102.659	53.0127
True	255	H3	Sample 38	24.18
True	255	H4	Sample 39	24.96
True	255	H5	Sample 40	24.5	24.515	2					14		22.7067	24.515	1.80833	-8.30167	315.537
True	255	H6	Sample 41	25.09
True	255	H7	Sample 42	24.53
True	255	H8	Sample 43	23.58	23.57	3					15		22.6	23.57	0.97	-9.14	564.175
True	255	H9	Sample 44	23.56
True	255	H10	Sample 45	23.84
True	255	H11	Sample 46	19.81	19.9733	1	dd main-3				16	dd main-3	22.3067	19.9733	-2.33333	-12.4433	5569.5	7122.68	3678.13	1162	600.053
True	255	H12	Sample 47	20.1
True	255	H13	Sample 48	20.01
True	255	H14	Sample 49	19.98	19.91	2					17		22.66	19.91	-2.75	-12.86	7434.4
True	255	H15	Sample 50	19.96
True	255	H16	Sample 51	19.86
True	255	H17	Sample 52	20.76	20.465	3					18		23.385	20.465	-2.92	-13.03	8364.13
True	255	H18	Sample 53	20.17
True	255	H19	Sample 54	20.01
Include	Color	Pos	Name	Cp	AtMuI	Status							RHIP1	AtMuI	∂	∂∂		mean	normalized mean	std dev	normalized std dev
True	255	I2	Sample 1	29.24	29.0033	1	WT				1	WT	23.16	29.0033	5.84333	0	1	1.08114	1	0.117209	0.108412
True	255	I3	Sample 2	28.97
True	255	I4	Sample 3	28.8
True	255	I5	Sample 4	28.61	28.525	2					2		22.6767	28.525	5.84833	0.005	0.99654
True	255	I6	Sample 5	28.44
True	255	I7	Sample 6	37.97
True	255	I8	Sample 7	27.86	27.855	3					3		22.33	27.855	5.525	-0.318333	1.24689
True	255	I9	Sample 8	28.59
True	255	I10	Sample 9	27.85
True	255	I11	Sample 10	26.03	26.0067	1	ddc				4	ddc	22.2033	26.0067	3.80333	-2.04	4.11246	11.3917	10.5367	7.26358	6.71843
True	255	I12	Sample 11	25.91
True	255	I13	Sample 12	26.08
True	255	I14	Sample 13	25.29	25.4233	2					5		22.71	25.4233	2.71333	-3.13	8.75435
True	255	I15	Sample 14	25.64
True	255	I16	Sample 15	25.34
True	255	I17	Sample 16	24.61	24.4933	3					6		23.0633	24.4933	1.43	-4.41333	21.3081
True	255	I18	Sample 17	24.08
True	255	I19	Sample 18	24.79
True	255	J2	Sample 19	24.89	24.48	1	main-3				7	main-3	22.7833	24.48	1.69667	-4.14667	17.7121	17.09	15.8073	4.33406	4.00878
True	255	J3	Sample 20	24.32
True	255	J4	Sample 21	24.23
True	255	J5	Sample 22	24.04	23.9667	2					8		22.5867	23.9667	1.38	-4.46333	22.0596
True	255	J6	Sample 23	23.89
True	255	J7	Sample 24	23.97
True	255	J8	Sample 25	24.26	24.25	3					9		21.93	24.25	2.32	-3.52333	11.4982
True	255	J9	Sample 26	24.33
True	255	J10	Sample 27	24.16
True	255	J11	Sample 28	19.27	19.2967	1	ddc main-3				10	ddc main-3	22.4067	19.2967	-3.11	-8.95333	495.703	370.059	342.285	97.9958	90.641
True	255	J12	Sample 29	19.15
True	255	J13	Sample 30	19.47
True	255	J14	Sample 31	20.07	20.3833	2					11		22.5433	20.3833	-2.16	-8.00333	256.592
True	255	J15	Sample 32	20.55
True	255	J16	Sample 33	20.53
True	255	J17	Sample 34	20	19.9733	3					12		22.6133	19.9733	-2.64	-8.48333	357.88
True	255	J18	Sample 35	19.72
True	255	J19	Sample 36	20.2
True	65280	K2	Sample 37		20.52	1	cmt3 main-3				13	cmt3 main-3	23.2133	20.52	-2.69333	-8.53667	371.358	369.824	342.068	18.459	17.0736
True	255	K3	Sample 38	20.31
True	255	K4	Sample 39	20.73
True	255	K5	Sample 40	19.85	19.9367	2					14		22.7067	19.9367	-2.77	-8.61333	391.626
True	255	K6	Sample 41	20.04
True	255	K7	Sample 42	19.92
True	255	K8	Sample 43	19.99	20.0067	3					15		22.6	20.0067	-2.59333	-8.43667	346.489
True	255	K9	Sample 44	19.89
True	255	K10	Sample 45	20.14
True	255	K11	Sample 46	24.48	24.55	1	dd main-3				16	dd main-3	22.3067	24.55	2.24333	-3.6	12.1257	17.9422	16.5956	6.71238	6.2086
True	255	K12	Sample 47	24.65
True	255	K13	Sample 48	24.52
True	255	K14	Sample 49	24.64	24.66	2					17		22.66	24.66	2	-3.84333	14.3535
True	255	K15	Sample 50	24.68
True	255	K16	Sample 51	25.3
True	255	K17	Sample 52	24.63	24.455	3					18		23.385	24.455	1.07	-4.77333	27.3474
True	255	K18	Sample 53	23.87
True	255	K19	Sample 54	24.28
Include	Color	Pos	Name	Cp	AtIS112A	Status							RHIP1	AtIS112A	∂	∂∂		mean	normalized mean	std dev	normalized std dev		AtIS112A	normalized mean	normalized std dev
True	255	L2	Sample 1	23.53	23.55	1	WT				1	WT	23.16	23.55	0.39	0	1	0.826319	1	0.125349	0.151695		wt	1	0.151695
True	255	L3	Sample 2	23.68																			ddc	11.7119	5.28637
True	255	L4	Sample 3	23.44																			m	4.3015	1.68392
True	255	L5	Sample 4	23.49	23.5633	2					2		22.6767	23.5633	0.886667	0.496667	0.708742						ddcm	34.2554	2.63265
True	255	L6	Sample 5	23.57																			cm	11.582	0.38616
True	255	L7	Sample 6	23.63																			ddm	20.0116	0.887046
True	255	L8	Sample 7	23.04	23.0967	3					3		22.33	23.0967	0.766667	0.376667	0.770215
True	255	L9	Sample 8	23.17
True	255	L10	Sample 9	23.08
True	255	L11	Sample 10	19.8	20.0067	1	ddc				4	ddc	22.2033	20.0067	-2.19667	-2.58667	6.00709	9.67777	11.7119	4.36823	5.28637
True	255	L12	Sample 11	20.31
True	255	L13	Sample 12	19.91
True	255	L14	Sample 13	20.46	20.25	2					5		22.71	20.25	-2.46	-2.85	7.21
True	255	L15	Sample 14	20.03
True	255	L16	Sample 15	20.26
True	255	L17	Sample 16	19.55	19.47	3					6		23.0633	19.47	-3.59333	-3.98333	15.8162
True	255	L18	Sample 17	19.71
True	255	L19	Sample 18	19.15
True	255	M2	Sample 19	21.6	21.5833	1	main-3				7	main-3	22.7833	21.5833	-1.2	-1.59	3.01049	3.55441	4.3015	1.39146	1.68392
True	255	M3	Sample 20	21.53
True	255	M4	Sample 21	21.62
True	255	M5	Sample 22	20.52	20.5267	2					8		22.5867	20.5267	-2.06	-2.45	5.46416
True	255	M6	Sample 23	20.6
True	255	M7	Sample 24	20.46
True	255	M8	Sample 25	21.21	21.19	3					9		21.93	21.19	-0.74	-1.13	2.18859
True	255	M9	Sample 26	21.09
True	255	M10	Sample 27	21.27
True	255	M11	Sample 28	17.68	17.8267	1	ddc main-3				10	ddc main-3	22.4067	17.8267	-4.58	-4.97	31.3414	28.3059	34.2554	2.17541	2.63265
True	255	M12	Sample 29	18.03
True	255	M13	Sample 30	17.77
True	255	M14	Sample 31	18.32	18.2133	2					11		22.5433	18.2133	-4.33	-4.72	26.3549
True	255	M15	Sample 32	18.19
True	255	M16	Sample 33	18.13
True	255	M17	Sample 34	18.15	18.2367	3					12		22.6133	18.2367	-4.37667	-4.76667	27.2213
True	255	M18	Sample 35	18.3
True	255	M19	Sample 36	18.26
True	255	N2	Sample 37	20.44	20.41	1	cmt3 main-3				13	cmt3 main-3	23.2133	20.41	-2.80333	-3.19333	9.14722	9.57045	11.582	0.319091	0.38616
True	255	N3	Sample 38	20.32
True	255	N4	Sample 39	20.47
True	255	N5	Sample 40	19.76	19.8267	2					14		22.7067	19.8267	-2.88	-3.27	9.64646
True	255	N6	Sample 41	19.92
True	255	N7	Sample 42	19.8
True	255	N8	Sample 43	19.76	19.68	3					15		22.6	19.68	-2.92	-3.31	9.91766
True	255	N9	Sample 44	19.56
True	255	N10	Sample 45	19.72
True	255	N11	Sample 46	18.71	18.7333	1	dd main-3				16	dd main-3	22.3067	18.7333	-3.57333	-3.96333	15.5985	16.536	20.0116	0.732983	0.887046
True	255	N12	Sample 47	18.79
True	255	N13	Sample 48	18.7
True	255	N14	Sample 49	19.13	18.93	2					17		22.66	18.93	-3.73	-4.12	17.3878
True	255	N15	Sample 50	18.83
True	255	N16	Sample 51	18.83
True	255	N17	Sample 52	19.9	19.72	3					18		23.385	19.72	-3.665	-4.055	16.6217
True	255	N18	Sample 53	19.2
True	255	N19	Sample 54	20.06
Include	Color	Pos	Name	Cp	LINE2	Concentration	Status						RHIP1	LINE2	∂	∂∂		mean	normalized mean	std dev	normalized std dev
True	255	I2	Sample 1	32.92	32.885	1	WT				1	WT	22.005	32.885	10.88	0	1	3.4612	1	1.96752	0.56845
True	255	I3	Sample 2	32.85
True	255	I4	Sample 3	32.53
True	255	I5	Sample 4	32.9	32.88	2					2		24.54	32.88	8.34	-2.54	5.81589
True	255	I6	Sample 5	32.86
True	255	I7	Sample 6	32.95
True	255	I8	Sample 7	32.99	32.785	3					3		23.74	32.785	9.045	-1.835	3.56771
True	255	I9	Sample 8	32.58
True	255	I10	Sample 9	32.34
True	255	I11	Sample 10	25.31	25.27	1	ddc				4	ddc	23.1533	25.27	2.11667	-8.76333	434.536	329.047	95.0674	112.326	32.4529
True	255	I12	Sample 11	25.23
True	255	I13	Sample 12	25.27
True	255	I14	Sample 13	26.19	26.165	2					5		22.7233	26.165	3.44167	-7.43833	173.445
True	255	I15	Sample 14	26.14
True	255	I16	Sample 15	26.11
True	255	I17	Sample 16	24.98	24.96	3					6		22.6467	24.96	2.31333	-8.56667	379.161
True	255	I18	Sample 17	24.94
True	255	I19	Sample 18	25
True	255	J2	Sample 19	33.72	33.25	1	main-3				7	main-3	25.15	33.25	8.1	-2.78	6.86852	4.72098	1.36397	1.92604	0.556465
True	255	J3	Sample 20	32.78
True	255	J4	Sample 21	32.91
True	255	J5	Sample 22	32.31	32.565	2					8		24.035	32.565	8.53	-2.35	5.09824
True	255	J6	Sample 23	32.82
True	65280	J7	Sample 24
True	255	J8	Sample 25	32.96	32.945	3					9		23.2	32.945	9.745	-1.135	2.19619
True	255	J9	Sample 26	32.93
True	255	J10	Sample 27	32.59
True	255	J11	Sample 28	23.02	23.02	1	ddc main-3				10	ddc main-3	23.05	23.02	-0.03	-10.91	1924.14	1197.05	345.848	517.056	149.386
True	255	J12	Sample 29	23.02
True	255	J13	Sample 30	22.88
True	255	J14	Sample 31	23.27	23.265	2					11		22.2	23.265	1.065	-9.815	900.761
True	255	J15	Sample 32	23.26
True	255	J16	Sample 33	23.25
True	255	J17	Sample 34	23.28	23.245	3					12		21.9467	23.245	1.29833	-9.58167	766.248
True	255	J18	Sample 35	23.21
True	255	J19	Sample 36	23.14
True	255	K2	Sample 37	24.55	24.51	1	cmt3 main-3				13	cmt3 main-3	25.3033	24.51	-0.793333	-11.6733	3266.05	2026.69	585.546	920.077	265.826
True	255	K3	Sample 38	24.47
True	255	K4	Sample 39	24.43
True	255	K5	Sample 40	24.05	24.06	2					14		23.9533	24.06	0.106667	-10.7733	1750.24
True	255	K6	Sample 41	24.07
True	255	K7	Sample 42	24
True	255	K8	Sample 43	24.53	24.545	3					15		23.72	24.545	0.825	-10.055	1063.79
True	255	K9	Sample 44	24.56
True	255	K10	Sample 45	24.49
True	255	K11	Sample 46	31.99	31.865	1	dd main-3				16	dd main-3	22.6067	31.865	9.25833	-1.62167	3.0773	2.0967	0.605773	0.720628	0.208202
True	255	K12	Sample 47	31.74
True	255	K13	Sample 48	31.53
True	255	K14	Sample 49	32.44	32.44	2					17		22.01	32.44	10.43	-0.45	1.36604
True	255	K15	Sample 50	32.44
True	255	K16	Sample 51	31.6
True	255	K17	Sample 52	31.74	31.765	3					18		21.77	31.765	9.995	-0.885	1.84676
True	255	K18	Sample 53	31.79
True	65280	K19	Sample 54
Include	Color	Pos	Name	Cp	LINE_1	Status							RHIP1	LINE_1	∂	∂∂		mean	normalized mean	std dev	normalized std dev
True	255	B2	Sample 1	27.12	27.01	1	WT				1	WT	23.16	27.01	3.85	0	1	0.762429	1	0.237571	0.311597
True	255	B3	Sample 2	32.45
True	255	B4	Sample 3	26.9
True	255	B5	Sample 4	32.54	32.54	2					2		22.6767
True	255	B6	Sample 5	26.81
True	255	B7	Sample 6	32.97
True	255	B8	Sample 7	27.21	27.11	3					3		22.33	27.11	4.78	0.93	0.524858
True	255	B9	Sample 8	34.64
True	255	B10	Sample 9	27.01
True	255	B11	Sample 10	31.14	31.12	1	ddc				4	ddc	22.2033	31.12	8.91667	5.06667	0.0298388	0.0664759	0.0871896	0.0261332	0.0342763
True	255	B12	Sample 11	30.11
True	255	B13	Sample 12	31.1
True	255	B14	Sample 13	30.18	30.1933	2					5		22.71	30.1933	7.48333	3.63333	0.0805856
True	255	B15	Sample 14	30.36
True	255	B16	Sample 15	30.04
True	255	B17	Sample 16	30.22	30.4033	3					6		23.0633	30.4033	7.34	3.49	0.0890031
True	255	B18	Sample 17	30.74
True	255	B19	Sample 18	30.25
True	255	C2	Sample 19	32.77	32.7867	1	main-3				7	main-3	22.7833	32.7867	10.0033	6.15333	0.0140495	0.0072294	0.00948206	0.00482378	0.00632686
True	255	C3	Sample 20	32.83
True	255	C4	Sample 21	32.76
True	255	C5	Sample 22	32.9	34.42	2					8		22.5867	34.42	11.8333	7.98333	0.00395164
True	255	C6	Sample 23	36.15
True	255	C7	Sample 24	34.21
True	255	C8	Sample 25	33.49	33.8633	3					9		21.93	33.8633	11.9333	8.08333	0.00368701
True	255	C9	Sample 26	34.08
True	255	C10	Sample 27	34.02
True	255	C11	Sample 28	24.03	23.8033	1	ddc main-3				10	ddc main-3	22.4067	23.8033	1.39667	-2.45333	5.4768	4.14581	5.43763	1.65364	2.16891
True	255	C12	Sample 29	23.69
True	255	C13	Sample 30	23.69
True	255	C14	Sample 31	25.89	25.5333	2					11		22.5433	25.5333	2.99	-0.86	1.81504
True	255	C15	Sample 32	25.44
True	255	C16	Sample 33	25.27
True	255	C17	Sample 34	24.14	24.1	3					12		22.6133	24.1	1.48667	-2.36333	5.14558
True	255	C18	Sample 35	24.23
True	255	C19	Sample 36	23.93
True	255	D2	Sample 37	25.07	25.27	1	cmt3 main-3				13	cmt3 main-3	23.2133	25.27	2.05667	-1.79333	3.46615	2.54208	3.33419	0.658339	0.863476
True	255	D3	Sample 38	25.28
True	255	D4	Sample 39	25.46
True	255	D5	Sample 40	25.34	25.4333	2					14		22.7067	25.4333	2.72667	-1.12333	2.1785
True	255	D6	Sample 41	25.27
True	255	D7	Sample 42	25.69
True	255	D8	Sample 43	25.51	25.4633	3					15		22.6	25.4633	2.86333	-0.986667	1.9816
True	255	D9	Sample 44	25.72
True	255	D10	Sample 45	25.16
True	255	D11	Sample 46	32.34	32.0833	1	dd main-3				16	dd main-3	22.3067	32.0833	9.77667	5.92667	0.0164398	0.025263	0.0331348	0.00673014	0.00882724
True	255	D12	Sample 47	31.69
True	255	D13	Sample 48	32.22
True	255	D14	Sample 49	31.81	31.7433	2					17		22.66	31.7433	9.08333	5.23333	0.0265833
True	255	D15	Sample 50	31.73
True	255	D16	Sample 51	31.69
True	255	D17	Sample 52	31.69	32.1667	3					18		23.385	32.1667	8.78167	4.93167	0.0327658
True	255	D18	Sample 53	31.59
True	255	D19	Sample 54	33.22
Experiment: exp3958 Selected Filter: SYBR Green I / HRM Dye (465-510)
Include	Color	Pos	Name	Cp	RHIP1	Status
True	255	B2	Sample 1	21.97	22.005	1	WT
True	255	B3	Sample 2	22.04
True	255	B4	Sample 3	21.67
True	255	B5	Sample 4	24.66	24.54	2
True	255	B6	Sample 5	24.51
True	255	B7	Sample 6	24.45
True	255	B8	Sample 7	23.89	23.74	3
True	255	B9	Sample 8	23.84
True	255	B10	Sample 9	23.49
True	255	B11	Sample 10	23.04	23.1533	1	ddc
True	255	B12	Sample 11	23.51
True	255	B13	Sample 12	22.91
True	255	B14	Sample 13	22.84	22.7233	2
True	255	B15	Sample 14	22.72
True	255	B16	Sample 15	22.61
True	255	B17	Sample 16	22.73	22.6467	3
True	255	B18	Sample 17	22.74
True	255	B19	Sample 18	22.47
True	255	C2	Sample 19	28.47	25.15	1	main-3
True	255	C3	Sample 20	25.84
True	255	C4	Sample 21	24.46
True	255	C5	Sample 22	25.21	24.035	2
True	255	C6	Sample 23	24.48
True	255	C7	Sample 24	23.59
True	255	C8	Sample 25	24.51	23.2	3
True	255	C9	Sample 26	23.52
True	255	C10	Sample 27	22.88
True	255	C11	Sample 28	23.46	23.05	1	ddc main-3
True	255	C12	Sample 29	23.02
True	255	C13	Sample 30	22.67
True	255	C14	Sample 31	22.24	22.2	2
True	255	C15	Sample 32	21.73
True	255	C16	Sample 33	22.63
True	255	C17	Sample 34	21.78	21.9467	3
True	255	C18	Sample 35	21.83
True	255	C19	Sample 36	22.23
True	255	D2	Sample 37	25.81	25.3033	1	cmt3 main-3
True	255	D3	Sample 38	25.58
True	255	D4	Sample 39	24.52
True	255	D5	Sample 40	24.35	23.9533	2
True	255	D6	Sample 41	23.67
True	255	D7	Sample 42	23.84
True	255	D8	Sample 43	23.55	23.72	3
True	255	D9	Sample 44	23.89
True	255	D10	Sample 45	22.97
True	255	D11	Sample 46	23	22.6067	1	dd main-3
True	255	D12	Sample 47	22.58
True	255	D13	Sample 48	22.24
True	255	D14	Sample 49	22.32	22.01	2
True	255	D15	Sample 50	21.94
True	255	D16	Sample 51	22.08
True	255	D17	Sample 52	21.7	21.77	3
True	255	D18	Sample 53	21.84
True	255	D19	Sample 54	22.81
Include	Color	Pos	Name	Cp	ATENSPM6	Concentration	Status						RHIP1	ATENSPM6	∂	∂∂		mean	normalized mean	std dev	normalized std dev
True	255	L2	Sample 1	27.87	27.77	1	WT				1	WT	22.005	27.77	5.765	0	1	5.19583	1	3.59024	0.690985
True	255	L3	Sample 2	27.69
True	255	L4	Sample 3	27.75
True	255	L5	Sample 4	26.87	27.0167	2					2		24.54	27.0167	2.47667	-3.28833	9.76983
True	255	L6	Sample 5	27.05
True	255	L7	Sample 6	27.13
True	255	L8	Sample 7	27.25	27.2367	3					3		23.74	27.2367	3.49667	-2.26833	4.81766
True	255	L9	Sample 8	27.29
True	255	L10	Sample 9	27.17
True	255	L11	Sample 10	23.75	23.6467	1	ddc				4	ddc	23.1533	23.6467	0.493333	-5.27167	38.6305	36.1802	6.96332	8.29506	1.59648
True	255	L12	Sample 11	23.64
True	255	L13	Sample 12	23.55
True	255	L14	Sample 13	23.1	23	2					5		22.7233	23	0.276667	-5.48833	44.8903
True	255	L15	Sample 14	23.09
True	255	L16	Sample 15	22.81
True	255	L17	Sample 16	23.68	23.7667	3					6		22.6467	23.7667	1.12	-4.645	25.0198
True	255	L18	Sample 17	23.78
True	255	L19	Sample 18	23.84
True	255	M2	Sample 19	23.51	23.5233	1	main-3				7	main-3	25.15	23.5233	-1.62667	-7.39167	167.924	103.016	19.8266	50.4921	9.71781
True	255	M3	Sample 20	23.48
True	255	M4	Sample 21	23.58
True	255	M5	Sample 22	23.29	23.21	2					8		24.035	23.21	-0.825	-6.59	96.3358
True	255	M6	Sample 23	23.17
True	255	M7	Sample 24	23.17
True	255	M8	Sample 25	29.08	23.48	3					9		23.2	23.48	0.28	-5.485	44.7867
True	255	M9	Sample 26	23.47
True	255	M10	Sample 27	23.49
True	255	M11	Sample 28	21.28	21.15	1	ddc main-3				10	ddc main-3	23.05	21.15	-1.9	-7.665	202.953	124.588	23.9784	55.4883	10.6794
True	255	M12	Sample 29	21.1
True	255	M13	Sample 30	21.07
True	255	M14	Sample 31	21.63	21.49	2					11		22.2	21.49	-0.71	-6.475	88.9548
True	255	M15	Sample 32	21.57
True	255	M16	Sample 33	21.27
True	255	M17	Sample 34	21.19	21.3567	3					12		21.9467	21.3567	-0.59	-6.355	81.8551
True	255	M18	Sample 35	21.43
True	255	M19	Sample 36	21.45
True	255	N2	Sample 37	22.5	22.3733	1	cmt3 main-3				13	cmt3 main-3	25.3033	22.3733	-2.93	-8.695	414.434	274.028	52.7399	102.024	19.6356
True	255	N3	Sample 38	22.17
True	255	N4	Sample 39	22.45
True	255	N5	Sample 40	21.7	21.8567	2					14		23.9533	21.8567	-2.09667	-7.86167	232.593
True	255	N6	Sample 41	22.07
True	255	N7	Sample 42	21.8
True	255	N8	Sample 43	21.88	22.0333	3					15		23.72	22.0333	-1.68667	-7.45167	175.055
True	255	N9	Sample 44	22.02
True	255	N10	Sample 45	22.2
True	255	N11	Sample 46	22.72	22.7033	1	dd main-3				16	dd main-3	22.6067	22.7033	0.0966667	-5.66833	50.8556	38.3688	7.38453	15.0962	2.90545
True	255	N12	Sample 47	22.72
True	255	N13	Sample 48	22.67
True	255	N14	Sample 49	22.29	22.2167	2					17		22.01	22.2167	0.206667	-5.55833	47.1221
True	255	N15	Sample 50	22.26
True	255	N16	Sample 51	22.1
True	255	N17	Sample 52	23.19	23.4367	3					18		21.77	23.4367	1.66667	-4.09833	17.1286
True	255	N18	Sample 53	23.29
True	255	N19	Sample 54	23.83

## Sheet: fig 5C
Experiment: exp3544 Selected Filter: SYBR Green I / HRM Dye (465-510)
Include	Color	Pos	Name	Cp	RHIP1	Status
TRUE	255	A1	Sample 1	22.77	22.8267	1	col
TRUE	255	A2	Sample 2	22.94
TRUE	255	A3	Sample 3	22.77
TRUE	255	A4	Sample 4	23.16	23.0667	2
TRUE	255	A5	Sample 5	22.82
TRUE	255	A6	Sample 6	23.22
TRUE	255	A7	Sample 7	22.8	22.9333	3
TRUE	255	A8	Sample 8	23.03
TRUE	255	A9	Sample 9	22.97
TRUE	255	A10	Sample 10	22.64	22.73	4	main-2
TRUE	255	A11	Sample 11	22.65
TRUE	255	A12	Sample 12	22.9
TRUE	255	A13	Sample 13	22.78	22.67	5
TRUE	255	A14	Sample 14	22.44
TRUE	255	A15	Sample 15	22.79
TRUE	255	A16	Sample 16	22.46	22.42	6
TRUE	255	A17	Sample 17	22.5
TRUE	255	A18	Sample 18	22.3
TRUE	255	A19	Sample 19	22.32	22.04	7	mail1-1
TRUE	255	A20	Sample 20	21.78
TRUE	255	A21	Sample 21	22.02
TRUE	255	A22	Sample 22	22.45	22.3733	8
TRUE	255	A23	Sample 23	22.12
TRUE	255	A24	Sample 24	22.55
TRUE	255	B1	Sample 25	22.57	22.6233	9
TRUE	255	B2	Sample 26	22.63
TRUE	255	B3	Sample 27	22.67
TRUE	255	B4	Sample 28	22.79	22.83	10	MAIN FLAG 7
TRUE	255	B5	Sample 29	22.82
TRUE	255	B6	Sample 30	22.88
TRUE	255	B7	Sample 31	22.43	22.4033	11
TRUE	255	B8	Sample 32	22.47
TRUE	255	B9	Sample 33	22.31
TRUE	255	B10	Sample 34	22.99	22.95	12
TRUE	255	B11	Sample 35	23.02
TRUE	255	B12	Sample 36	22.84
TRUE	255	B13	Sample 37	22.91	22.8333	13	MAIN MYC 5
TRUE	255	B14	Sample 38	22.79
TRUE	255	B15	Sample 39	22.8
TRUE	255	B16	Sample 40	22.22	22.29	14
TRUE	255	B17	Sample 41	22.15
TRUE	255	B18	Sample 42	22.5
TRUE	255	B19	Sample 43	23.19	23.1567	15
TRUE	255	B20	Sample 44	23.16
TRUE	255	B21	Sample 45	23.12
TRUE	255	B22	Sample 46	23.5	23.2667	16	MAIL1 FLAG 4
TRUE	255	B23	Sample 47	23.13
TRUE	255	B24	Sample 48	23.17
TRUE	255	C1	Sample 49	22.9	22.7733	17
TRUE	255	C2	Sample 50	22.74
TRUE	255	C3	Sample 51	22.68
TRUE	255	C4	Sample 52	23.23	22.96	18
TRUE	255	C5	Sample 53	22.84
TRUE	255	C6	Sample 54	22.81
TRUE	255	C7	Sample 55	23.06	22.98	19	MAIL1 MYC 4
TRUE	255	C8	Sample 56	22.94
TRUE	255	C9	Sample 57	22.94
TRUE	255	C10	Sample 58	22.69	22.8567	20
TRUE	255	C11	Sample 59	23.09
TRUE	255	C12	Sample 60	22.79
TRUE	255	C13	Sample 61	23.5	23.3333	21
TRUE	255	C14	Sample 62	23.44
TRUE	255	C15	Sample 63	23.06
Experiment: exp3545 Selected Filter: SYBR Green I / HRM Dye (465-510)
Include	Color	Pos	Name	Cp	ATCOPIA28	Concentration	Status						RHIP1	ATCOPIA28	∂	∂∂		mean	normalized mean	std dev	normalized std dev
TRUE	255	A1	Sample 1	34.12	35.6433	1	col				1	col	22.8267	35.6433	12.8167	0	1	1.05475	1	0.497494	0.47167
TRUE	255	A2	Sample 2	37.77
TRUE	255	A3	Sample 3	35.04
TRUE	255	A4	Sample 4	36.01	35.1267	2					2		23.0667	35.1267	12.06	-0.756667	1.68958
TRUE	255	A5	Sample 5	34.12
TRUE	255	A6	Sample 6	35.25
TRUE	255	A7	Sample 7	35.87	36.825	3					3		22.9333	36.825	13.8917	1.075	0.474671
TRUE	65280	A8	Sample 8
TRUE	255	A9	Sample 9	37.78
TRUE	255	A10	Sample 10	26.06	26.0033	4	main-2				4	main-2	22.73	26.0033	3.27333	-9.54333	746.156	631.758	598.964	126.064	119.52
TRUE	255	A11	Sample 11	25.99
TRUE	255	A12	Sample 12	25.96
TRUE	255	A13	Sample 13	26.02	26.05	5					5		22.67	26.05	3.38	-9.43667	692.978
TRUE	255	A14	Sample 14	26.05
TRUE	255	A15	Sample 15	26.08
TRUE	255	A16	Sample 16	26.28	26.4033	6					6		22.42	26.4033	3.98333	-8.83333	456.14
TRUE	255	A17	Sample 17	26.43
TRUE	255	A18	Sample 18	26.5
TRUE	255	A19	Sample 19	25.66	25.6367	7	mail1-1				7	mail1-1	22.04	25.6367	3.59667	-9.22	596.344	514.021	487.338	90.4799	85.7832
TRUE	255	A20	Sample 20	25.62
TRUE	255	A21	Sample 21	25.63
TRUE	255	A22	Sample 22	26.19	26.0667	8					8		22.3733	26.0667	3.69333	-9.12333	557.695
TRUE	255	A23	Sample 23	25.97
TRUE	255	A24	Sample 24	26.04
TRUE	255	B1	Sample 25	26.8	26.84	9					9		22.6233	26.84	4.21667	-8.6	388.023
TRUE	255	B2	Sample 26	26.94
TRUE	255	B3	Sample 27	26.78
TRUE	255	B4	Sample 28	35.97	34.8633	10	MAIN FLAG 7				10	MAIN FLAG 7	22.83	34.8633	12.0333	-0.783333	1.7211	2.62447	2.48823	0.886053	0.840059
TRUE	255	B5	Sample 29	35.05
TRUE	255	B6	Sample 30	33.57
TRUE	255	B7	Sample 31	33.65	33.2833	11					11		22.4033	33.2833	10.88	-1.93667	3.8282
TRUE	255	B8	Sample 32	32.88
TRUE	255	B9	Sample 33	33.32
TRUE	255	B10	Sample 34	35.9	34.55	12					12		22.95	34.55	11.6	-1.21667	2.32409
TRUE	255	B11	Sample 35	34.29
TRUE	255	B12	Sample 36	33.46
TRUE	255	B13	Sample 37	33.16	34.07	13	MAIN MYC 5				13	MAIN MYC 5	22.8333	34.07	11.2367	-1.58	2.9897	4.55518	4.31872	1.68902	1.60135
TRUE	255	B14	Sample 38	34.15
TRUE	255	B15	Sample 39	34.9
TRUE	255	B16	Sample 40	33.09	33.19	14					14		22.29	33.19	10.9	-1.91667	3.7755
TRUE	255	B17	Sample 41	33.49
TRUE	255	B18	Sample 42	32.99
TRUE	255	B19	Sample 43	33.88	33.1867	15					15		23.1567	33.1867	10.03	-2.78667	6.90034
TRUE	255	B20	Sample 44	32.72
TRUE	255	B21	Sample 45	32.96
TRUE	255	B22	Sample 46	34.19	33.6167	16	MAIL1 FLAG 4				16	MAIL1 FLAG 4	23.2667	33.6167	10.35	-2.46667	5.52765	4.2091	3.99061	0.989051	0.93771
TRUE	255	B23	Sample 47	33.86
TRUE	255	B24	Sample 48	32.8
TRUE	255	C1	Sample 49	33.77	33.6067	17					17		22.7733	33.6067	10.8333	-1.98333	3.95406
TRUE	255	C2	Sample 50	33.81
TRUE	255	C3	Sample 51	33.24
TRUE	255	C4	Sample 52	34.09	34.1233	18					18		22.96	34.1233	11.1633	-1.65333	3.1456
TRUE	255	C5	Sample 53	34.85
TRUE	255	C6	Sample 54	33.43
TRUE	255	C7	Sample 55	34.54	34.5033	19	MAIL1 MYC 4				19	MAIL1 MYC 4	22.98	34.5033	11.5233	-1.29333	2.45094	3.92653	3.72271	1.04341	0.989247
TRUE	255	C8	Sample 56	34.49
TRUE	255	C9	Sample 57	34.48
TRUE	255	C10	Sample 58	33.07	33.45	20					20		22.8567	33.45	10.5933	-2.22333	4.66971
TRUE	255	C11	Sample 59	33.6
TRUE	255	C12	Sample 60	33.68
TRUE	255	C13	Sample 61	34.5	33.93	21					21		23.3333	33.93	10.5967	-2.22	4.65893
TRUE	255	C14	Sample 62	34.01
TRUE	255	C15	Sample 63	33.28
Include	Color	Pos	Name	Cp	ATMU1	Concentration	Status						RHIP1	ATMU1	∂	∂∂		mean	normalized mean	std dev	normalized std dev
TRUE	255	E1	Sample 97	34.99	35.44	1	col				1	col	22.8267	35.44	12.6133	0	1	1.12082	1	0.213424	0.190418
TRUE	255	E2	Sample 98	35.68
TRUE	255	E3	Sample 99	35.65
TRUE	255	E4	Sample 100	35.63	35.7667	2					2		23.0667	35.7667	12.7	0.0866667	0.941696
TRUE	255	E5	Sample 101	35.7
TRUE	255	E6	Sample 102	35.97
TRUE	255	E7	Sample 103	34.7	35.04	3					3		22.9333	35.04	12.1067	-0.506667	1.42076
TRUE	255	E8	Sample 104	34.95
TRUE	255	E9	Sample 105	35.47
TRUE	255	E10	Sample 106	28.01	28.1367	4	main-2				4	main-2	22.73	28.1367	5.40667	-7.20667	147.714	142.673	127.294	30.5343	27.2429
TRUE	255	E11	Sample 107	28.32
TRUE	255	E12	Sample 108	28.08
TRUE	255	E13	Sample 109	28.65	28.5967	5					5		22.67	28.5967	5.92667	-6.68667	103.012
TRUE	255	E14	Sample 110	28.64
TRUE	255	E15	Sample 111	28.5
TRUE	255	E16	Sample 112	27.64	27.5633	6					6		22.42	27.5633	5.14333	-7.47	177.294
TRUE	255	E17	Sample 113	27.56
TRUE	255	E18	Sample 114	27.49
TRUE	255	E19	Sample 115	26.74	26.8833	7	mail1-1				7	mail1-1	22.04	26.8833	4.84333	-7.77	218.275	211.256	188.483	6.2039	5.53515
TRUE	255	E20	Sample 116	26.97
TRUE	255	E21	Sample 117	26.94
TRUE	255	E22	Sample 118	27.14	27.2567	8					8		22.3733	27.2567	4.88333	-7.73	212.306
TRUE	255	E23	Sample 119	27.07
TRUE	255	E24	Sample 120	27.56
TRUE	255	F1	Sample 121	27.43	27.57	9					9		22.6233	27.57	4.94667	-7.66667	203.187
TRUE	255	F2	Sample 122	27.51
TRUE	255	F3	Sample 123	27.77
TRUE	255	F4	Sample 124	33.36	33.68	10	MAIN FLAG 7				10	MAIN FLAG 7	22.83	33.68	10.85	-1.76333	3.39482	1.92147	1.71434	1.06363	0.948974
TRUE	255	F5	Sample 125	33.63
TRUE	255	F6	Sample 126	34.05
TRUE	255	F7	Sample 127	34.27	34.4833	11					11		22.4033	34.4833	12.08	-0.533333	1.44727
TRUE	255	F8	Sample 128	34.57
TRUE	255	F9	Sample 129	34.61
TRUE	255	F10	Sample 130	34.88	35.68	12					12		22.95	35.68	12.73	0.116667	0.922316
TRUE	255	F11	Sample 131	36.62
TRUE	255	F12	Sample 132	35.54
TRUE	255	F13	Sample 133	33.31	33.3033	13	MAIN MYC 5				13	MAIN MYC 5	22.8333	33.3033	10.47	-2.14333	4.41782	2.13561	1.9054	1.61715	1.44282
TRUE	255	F14	Sample 134	33.47
TRUE	255	F15	Sample 135	33.13
TRUE	255	F16	Sample 136	35.21	35.11	14					14		22.29	35.11	12.82	0.206667	0.866537
TRUE	255	F17	Sample 137	34.87
TRUE	255	F18	Sample 138	35.25
TRUE	255	F19	Sample 139	35.46	35.6033	15					15		23.1567	35.6033	12.4467	-0.166667	1.12246
TRUE	255	F20	Sample 140	35.87
TRUE	255	F21	Sample 141	35.48
TRUE	255	F22	Sample 142	33.07	33.3	16	MAIL1 FLAG 4				16	MAIL1 FLAG 4	23.2667	33.3	10.0333	-2.58	5.9794	6.21756	5.54733	0.206509	0.184248
TRUE	255	F23	Sample 143	33.16
TRUE	255	F24	Sample 144	33.67
TRUE	255	G1	Sample 145	32.63	32.7567	17					17		22.7733	32.7567	9.98333	-2.63	6.19026
TRUE	255	G2	Sample 146	32.15
TRUE	255	G3	Sample 147	33.49
TRUE	255	G4	Sample 148	33.45	32.8767	18					18		22.96	32.8767	9.91667	-2.69667	6.48302
TRUE	255	G5	Sample 149	32.53
TRUE	255	G6	Sample 150	32.65
TRUE	255	G7	Sample 151	31	31.0667	19	MAIL1 MYC 4				19	MAIL1 MYC 4	22.98	31.0667	8.08667	-4.52667	23.0495	35.3236	31.5158	10.8366	9.66843
TRUE	255	G8	Sample 152	31.02
TRUE	255	G9	Sample 153	31.18
TRUE	255	G10	Sample 154	29.98	30.4033	20					20		22.8567	30.4033	7.54667	-5.06667	33.5134
TRUE	255	G11	Sample 155	30.49
TRUE	255	G12	Sample 156	30.74
TRUE	255	G13	Sample 157	29.82	30.32	21					21		23.3333	30.32	6.98667	-5.62667	49.4078
TRUE	255	G14	Sample 158	30.59
TRUE	255	G15	Sample 159	30.55
Include	Color	Pos	Name	Cp	ROMANIAT5	Concentration	Status						RHIP1	ROMANIAT5	∂	∂∂		mean	normalized mean	std dev	normalized std dev
TRUE	65280	I1	Sample 193		40	1	col				1	col	22.8267	40	17.1733	0	1	1.08591	1	0.0741741	0.0683059
TRUE	65280	I2	Sample 194
TRUE	65280	I3	Sample 195
TRUE	255	I4	Sample 196	40	40	2					2		23.0667	40	16.9333	-0.24	1.18099
TRUE	65280	I5	Sample 197
TRUE	65280	I6	Sample 198
TRUE	65280	I7	Sample 199		40	3					3		22.9333	40	17.0667	-0.106667	1.07674
TRUE	65280	I8	Sample 200
TRUE	65280	I9	Sample 201
TRUE	255	I10	Sample 202	30.99	31.19	4	main-2				4	main-2	22.73	31.19	8.46	-8.71333	419.735	326.191	300.385	91.6153	84.3673
TRUE	255	I11	Sample 203	30.72
TRUE	255	I12	Sample 204	31.86
TRUE	255	I13	Sample 205	31.31	31.3633	5					5		22.67	31.3633	8.69333	-8.48	357.054
TRUE	255	I14	Sample 206	31.45
TRUE	255	I15	Sample 207	31.33
TRUE	255	I16	Sample 208	32	31.9367	6					6		22.42	31.9367	9.51667	-7.65667	201.784
TRUE	255	I17	Sample 209	31.98
TRUE	255	I18	Sample 210	31.83
TRUE	255	I19	Sample 211	32.09	31.5467	7	mail1-1				7	mail1-1	22.04	31.5467	9.50667	-7.66667	203.187	176.632	162.658	24.5382	22.5969
TRUE	255	I20	Sample 212	30.9
TRUE	255	I21	Sample 213	31.65
TRUE	255	I22	Sample 214	32.95	32.3767	8					8		22.3733	32.3767	10.0033	-7.17	144.007
TRUE	255	I23	Sample 215	31.65
TRUE	255	I24	Sample 216	32.53
TRUE	255	J1	Sample 217	32.31	32.2833	9					9		22.6233	32.2833	9.66	-7.51333	182.7
TRUE	255	J2	Sample 218	31.97
TRUE	255	J3	Sample 219	32.57
TRUE	255	J4	Sample 220	36.79	36.175	10	MAIN FLAG 7				10	MAIN FLAG 7	22.83	36.175	13.345	-3.82833	14.2051	8.86649	8.16503	3.82874	3.52583
TRUE	255	J5	Sample 221	35.56
TRUE	65280	J6	Sample 222
TRUE	255	J7	Sample 223	35.22	37.14	11					11		22.4033	37.14	14.7367	-2.43667	5.41389
TRUE	255	J8	Sample 224	39.06
TRUE	65280	J9	Sample 225
TRUE	255	J10	Sample 226	35.5	37.32	12					12		22.95	37.32	14.37	-2.80333	6.98051
TRUE	255	J11	Sample 227	36.46
TRUE	255	J12	Sample 228	40
TRUE	255	J13	Sample 229	38.92	38.3967	13	MAIN MYC 5				13	MAIN MYC 5	22.8333	38.3967	15.5633	-1.61	3.05252	5.44538	5.01458	2.13871	1.96951
TRUE	255	J14	Sample 230	36.27
TRUE	255	J15	Sample 231	40
TRUE	255	J16	Sample 232	35.17	37.13	14					14		22.29	37.13	14.84	-2.33333	5.03968
TRUE	255	J17	Sample 233	40
TRUE	255	J18	Sample 234	36.22
TRUE	255	J19	Sample 235	35.87	37.2867	15					15		23.1567	37.2867	14.13	-3.04333	8.24394
TRUE	255	J20	Sample 236	35.99
TRUE	255	J21	Sample 237	40
TRUE	65280	J22	Sample 238		38.04	16	MAIL1 FLAG 4				16	MAIL1 FLAG 4	23.2667	38.04	14.7733	-2.4	5.27803	6.7	6.16994	4.76597	4.38892
TRUE	255	J23	Sample 239	39.58
TRUE	255	J24	Sample 240	36.5
TRUE	255	K1	Sample 241	34.75	36.2333	17					17		22.7733	36.2333	13.46	-3.71333	13.1167
TRUE	255	K2	Sample 242	37.94
TRUE	255	K3	Sample 243	36.01
TRUE	255	K4	Sample 244	40	39.3633	18					18		22.96	39.3633	16.4033	-0.77	1.70527
TRUE	255	K5	Sample 245	40
TRUE	255	K6	Sample 246	38.09
TRUE	65280	K7	Sample 247		38.475	19	MAIL1 MYC 4				19	MAIL1 MYC 4	22.98	38.475	15.495	-1.67833	3.20058	4.5816	4.21913	0.977149	0.899843
TRUE	255	K8	Sample 248	36.95
TRUE	255	K9	Sample 249	40
TRUE	255	K10	Sample 250	36.79	37.62	20					20		22.8567	37.62	14.7633	-2.41	5.31474
TRUE	255	K11	Sample 251	40
TRUE	255	K12	Sample 252	36.07
TRUE	65280	K13	Sample 253		38.12	21					21		23.3333	38.12	14.7867	-2.38667	5.22948
TRUE	255	K14	Sample 254	36.24
TRUE	255	K15	Sample 255	40
Experiment: exp3546 Selected Filter: SYBR Green I / HRM Dye (465-510)
Include	Color	Pos	Name	Cp	HELITRONY1D	Concentration	Status						RHIP1	HELITRONY1D	∂	∂∂		mean	normalized mean	std dev	normalized std dev
TRUE	255	A1	Sample 1	34.97	35.0667	1	col				1	col	22.8267	35.0667	12.24	0	1	1.12803	1	0.102617	0.0909695
TRUE	255	A2	Sample 2	35.81
TRUE	255	A3	Sample 3	34.42
TRUE	255	A4	Sample 4	34.94	35.1267	2					2		23.0667	35.1267	12.06	-0.18	1.13288
TRUE	255	A5	Sample 5	36.14
TRUE	255	A6	Sample 6	34.3
TRUE	255	A7	Sample 7	35.77	34.85	3					3		22.9333	34.85	11.9167	-0.323333	1.25122
TRUE	255	A8	Sample 8	34.2
TRUE	255	A9	Sample 9	34.58
TRUE	255	A10	Sample 10	28.48	28.2533	4	main-2				4	main-2	22.73	28.2533	5.52333	-6.71667	105.176	113.258	100.403	25.2118	22.3502
TRUE	255	A11	Sample 11	28.33
TRUE	255	A12	Sample 12	27.95
TRUE	255	A13	Sample 13	27.77	27.7067	5					5		22.67	27.7067	5.03667	-7.20333	147.374
TRUE	255	A14	Sample 14	27.74
TRUE	255	A15	Sample 15	27.61
TRUE	255	A16	Sample 16	28.27	28.2133	6					6		22.42	28.2133	5.79333	-6.44667	87.2248
TRUE	255	A17	Sample 17	28.22
TRUE	255	A18	Sample 18	28.15
TRUE	255	A19	Sample 19	27.08	27.0667	7	mail1-1				7	mail1-1	22.04	27.0667	5.02667	-7.21333	148.399	145.277	128.788	10.3791	9.20108
TRUE	255	A20	Sample 20	27.02
TRUE	255	A21	Sample 21	27.1
TRUE	255	A22	Sample 22	27.43	27.3267	8					8		22.3733	27.3267	4.95333	-7.28667	156.137
TRUE	255	A23	Sample 23	27.12
TRUE	255	A24	Sample 24	27.43
TRUE	255	B1	Sample 25	28.15	27.8267	9					9		22.6233	27.8267	5.20333	-7.03667	131.295
TRUE	255	B2	Sample 26	27.75
TRUE	255	B3	Sample 27	27.58
TRUE	255	B4	Sample 28	31.23	30.98	10	MAIN FLAG 7				10	MAIN FLAG 7	22.83	30.98	8.15	-4.09	17.0299	11.7059	10.3772	4.19615	3.71988
TRUE	255	B5	Sample 29	30.93
TRUE	255	B6	Sample 30	30.78
TRUE	255	B7	Sample 31	31.89	31.8833	11					11		22.4033	31.8833	9.48	-2.76	6.77396
TRUE	255	B8	Sample 32	31.74
TRUE	255	B9	Sample 33	32.02
TRUE	255	B10	Sample 34	31.63	31.69	12					12		22.95	31.69	8.74	-3.5	11.3137
TRUE	255	B11	Sample 35	31.66
TRUE	255	B12	Sample 36	31.78
TRUE	255	B13	Sample 37	31.71	31.1267	13	MAIN MYC 5				13	MAIN MYC 5	22.8333	31.1267	8.29333	-3.94667	15.4193	23.061	20.4436	6.26602	5.55482
TRUE	255	B14	Sample 38	30.99
TRUE	255	B15	Sample 39	30.68
TRUE	255	B16	Sample 40	29.25	29.5867	14					14		22.29	29.5867	7.29667	-4.94333	30.7675
TRUE	255	B17	Sample 41	29.85
TRUE	255	B18	Sample 42	29.66
TRUE	255	B19	Sample 43	31.01	30.8733	15					15		23.1567	30.8733	7.71667	-4.52333	22.9964
TRUE	255	B20	Sample 44	30.7
TRUE	255	B21	Sample 45	30.91
TRUE	255	B22	Sample 46	31.91	31.87	16	MAIL1 FLAG 4				16	MAIL1 FLAG 4	23.2667	31.87	8.60333	-3.63667	12.4379	15.6146	13.8423	2.3209	2.05747
TRUE	255	B23	Sample 47	32.06
TRUE	255	B24	Sample 48	31.64
TRUE	255	C1	Sample 49	30.85	30.85	17					17		22.7733	30.85	8.07667	-4.16333	17.9179
TRUE	255	C2	Sample 50	30.99
TRUE	255	C3	Sample 51	30.71
TRUE	255	C4	Sample 52	31.49	31.1567	18					18		22.96	31.1567	8.19667	-4.04333	16.4879
TRUE	255	C5	Sample 53	31.07
TRUE	255	C6	Sample 54	30.91
TRUE	255	C7	Sample 55	31.74	31.17	19	MAIL1 MYC 4				19	MAIL1 MYC 4	22.98	31.17	8.19	-4.05	16.5642	20.6471	18.3036	2.9323	2.59948
TRUE	255	C8	Sample 56	30.93
TRUE	255	C9	Sample 57	30.84
TRUE	255	C10	Sample 58	30.5	30.6333	20					20		22.8567	30.6333	7.77667	-4.46333	22.0596
TRUE	255	C11	Sample 59	30.88
TRUE	255	C12	Sample 60	30.52
TRUE	255	C13	Sample 61	31.22	31.03	21					21		23.3333	31.03	7.69667	-4.54333	23.3174
TRUE	255	C14	Sample 62	30.98
TRUE	255	C15	Sample 63	30.89

## Sheet: fig 5D
Experiment: exp3991 Selected Filter: SYBR Green I / HRM Dye (465-510)
Include	Color	Pos	Name	Cp	RHIP1	Status
True	255	B2	Sample 1	23.75	23.7533	col rep1
True	255	B3	Sample 2	23.87
True	255	B4	Sample 3	23.64
True	255	B5	Sample 4	23.19	23.4367	col rep2
True	255	B6	Sample 5	23.5
True	255	B7	Sample 6	23.62
True	255	B8	Sample 7	23.13	23.1267	col rep3
True	255	B9	Sample 8	23.24
True	255	B10	Sample 9	23.01
True	255	B11	Sample 10	23.3	22.9533	mail1 rep1
True	255	B12	Sample 11	22.75
True	255	B13	Sample 12	22.81
True	255	B14	Sample 13	22.71	22.49	mail1 rep2
True	255	B15	Sample 14	22.68
True	255	B16	Sample 15	22.08
True	255	B17	Sample 16	22.59	22.6	mail1 rep3
True	255	B18	Sample 17	22.67
True	255	B19	Sample 18	22.54
True	255	B20	Sample 19	22.71	23.0233	main2 rep1
True	255	B21	Sample 20	23.08
True	255	B22	Sample 21	23.28
True	255	C2	Sample 22	23.2	23.11	main2 rep2
True	255	C3	Sample 23	22.95
True	255	C4	Sample 24	23.18
True	255	C5	Sample 25	23.18	23.1633	main2 rep3
True	255	C6	Sample 26	23.19
True	255	C7	Sample 27	23.12
True	255	C8	Sample 28	23.48	23.1367	mail MYC rep1
True	255	C9	Sample 29	22.89
True	255	C10	Sample 30	23.04
True	255	C11	Sample 31	22.73	22.6833	mail MYC rep2
True	255	C12	Sample 32	22.62
True	255	C13	Sample 33	22.7
True	255	C14	Sample 33	23	22.4367	mail MYC rep3
True	255	C15	Sample 34	22.23
True	255	C16	Sample 35	22.08
True	255	C17	Sample 36	22.58	22.4667	mail FLAG rep1
True	255	C18	Sample 37	22.28
True	255	C19	Sample 38	22.54
True	255	C20	Sample 39	23.1	23.1567	mail FLAG rep2
True	255	C21	Sample 40	23.55
True	255	C22	Sample 41	22.82
True	255	D2	Sample 42	23.52	23.47	mail FLAG rep3
True	255	D3	Sample 43	23.46
True	255	D4	Sample 44	23.43
True	255	D5	Sample 45	23.01	23.0267	main MYC rep1
True	255	D6	Sample 46	23.07
True	255	D7	Sample 47	23
True	255	D8	Sample 48	22.68	22.69	main MYC rep2
True	255	D9	Sample 49	22.66
True	255	D10	Sample 50	22.73
True	255	D11	Sample 51	22.98	23.2633	main MYC rep3
True	255	D12	Sample 52	23.28
True	255	D13	Sample 53	23.53
True	255	D14	Sample 54	22.81	22.7433	main FLAG rep1
True	255	D15	Sample 55	22.82
True	255	D16	Sample 56	22.6
True	255	D17	Sample 57	22.71	22.75	main FLAG rep2
True	255	D18	Sample 58	22.66
True	255	D19	Sample 59	22.88
True	255	D20	Sample 60	23.12	22.95	main FLAG rep3
True	255	D21	Sample 61	22.78
True	255	D22	Sample 62	22.95
Include	Color	Pos	Name	Cp	TAF4b	Concentration	Status						RHIP1	TAF4b	∂	∂∂		mean	normalized mean	std dev	normalized std dev
True	255	E2	Sample 1	30.34	30.46	col						col	23.7533	30.46	6.70667	0	1	1.01482	1	0.0124631	0.0122811
True	255	E3	Sample 2	30.73
True	255	E4	Sample 3	30.31
True	255	E5	Sample 4	30.18	30.1								23.4367	30.1	6.66333	-0.0433333	1.03049
True	255	E6	Sample 5	30
True	255	E7	Sample 6	30.12
True	255	E8	Sample 7	29.75	29.8133								23.1267	29.8133	6.68667	-0.02	1.01396
True	255	E9	Sample 8	29.83
True	255	E10	Sample 9	29.86
True	255	E11	Sample 10	25.47	25.49	mail1						mail1	22.9533	25.49	2.53667	-4.17	18.0009	14.8357	14.6191	2.81705	2.77592
True	255	E12	Sample 11	25.46
True	255	E13	Sample 12	25.54
True	255	E14	Sample 13	25.24	25.2567								22.49	25.2567	2.76667	-3.94	15.3482
True	255	E15	Sample 14	25.28
True	255	E16	Sample 15	25.25
True	255	E17	Sample 16	25.95	25.8267								22.6	25.8267	3.22667	-3.48	11.1579
True	255	E18	Sample 17	25.69
True	255	E19	Sample 18	25.84
True	255	E20	Sample 19	25.65	25.64	main2						main2	23.0233	25.64	2.61667	-4.09	17.0299	18.8518	18.5766	1.83166	1.80492
True	255	E21	Sample 20	25.58
True	255	E22	Sample 21	25.69
True	255	F2	Sample 22	25.69	25.6333								23.11	25.6333	2.52333	-4.18333	18.1681
True	255	F3	Sample 23	25.58
True	255	F4	Sample 24	25.63
True	255	F5	Sample 25	25.51	25.4533								23.1633	25.4533	2.29	-4.41667	21.3574
True	255	F6	Sample 26	25.35
True	255	F7	Sample 27	25.5
True	255	F8	Sample 28	28.55	28.52	mail MYC						mail MYC	23.1367	28.52	5.38333	-1.32333	2.50244	2.19801	2.16592	0.297558	0.293214
True	255	F9	Sample 29	28.58
True	255	F10	Sample 30	28.43
True	255	F11	Sample 31	28.21	28.19								22.6833	28.19	5.50667	-1.2	2.2974
True	255	F12	Sample 32	28.35
True	255	F13	Sample 33	28.01
True	255	F14	Sample 33	28.27	28.3								22.4367	28.3	5.86333	-0.843333	1.79419
True	255	F15	Sample 34	28.2
True	255	F16	Sample 35	28.43
True	255	F17	Sample 36	28.18	28.1633	mail FLAG						mail FLAG	22.4667	28.1633	5.69667	-1.01	2.01391	3.26197	3.21434	1.09009	1.07417
True	255	F18	Sample 37	28.32
True	255	F19	Sample 38	27.99
True	65280	F20	Sample 39		27.64								23.1567	27.64	4.48333	-2.22333	4.66971
True	255	F21	Sample 40	27.09
True	255	F22	Sample 41	28.19
True	255	G2	Sample 42	28.58	28.5433								23.47	28.5433	5.07333	-1.63333	3.10229
True	255	G3	Sample 43	28.55
True	255	G4	Sample 44	28.5
True	255	G5	Sample 45	28.62	28.67	main MYC						main MYC	23.0267	28.67	5.64333	-1.06333	2.08975	1.91744	1.88944	0.243696	0.240137
True	255	G6	Sample 46	28.73
True	255	G7	Sample 47	28.66
True	255	G8	Sample 48	28.74	28.7433								22.69	28.7433	6.05333	-0.653333	1.5728
True	255	G9	Sample 49	28.89
True	255	G10	Sample 50	28.6
True	255	G11	Sample 51	28.86	28.9067								23.2633	28.9067	5.64333	-1.06333	2.08975
True	255	G12	Sample 52	28.86
True	255	G13	Sample 53	29
True	255	G14	Sample 54	28.71	28.7967	main FLAG						main FLAG	22.7433	28.7967	6.05333	-0.653333	1.5728	1.67549	1.65103	0.179147	0.176532
True	255	G15	Sample 55	28.76
True	255	G16	Sample 56	28.92
True	255	G17	Sample 57	28.84	28.8467								22.75	28.8467	6.09667	-0.61	1.52626
True	255	G18	Sample 58	28.8
True	255	G19	Sample 59	28.9
True	255	G20	Sample 60	28.57	28.71								22.95	28.71	5.76	-0.946667	1.92741
True	255	G21	Sample 61	28.75
True	255	G22	Sample 62	28.81
Include	Color	Pos	Name	Cp	At12cys-2	Concentration	Status						RHIP1	At12cys-2	∂	∂∂		mean	normalized mean	std dev	normalized std dev
True	255	H2	Sample 1	32.99	32.7667	col						col	23.7533	32.7667	9.01333	0	1	1.16302	1	0.153783	0.132227
True	255	H3	Sample 2	32.81
True	255	H4	Sample 3	32.5
True	255	H5	Sample 4	32.62	32.2867								23.4367	32.2867	8.85	-0.163333	1.11987
True	255	H6	Sample 5	31.78
True	255	H7	Sample 6	32.46
True	255	H8	Sample 7	31.49	31.6867								23.1267	31.6867	8.56	-0.453333	1.3692
True	255	H9	Sample 8	31.78
True	255	H10	Sample 9	31.79
True	255	H11	Sample 10	25.59	25.5333	mail1						mail1	22.9533	25.5333	2.58	-6.43333	86.4224	75.9578	65.3106	17.613	15.1441
True	255	H12	Sample 11	25.51
True	255	H13	Sample 12	25.5
True	255	H14	Sample 13	25.04	25.0067								22.49	25.0067	2.51667	-6.49667	90.3008
True	255	H15	Sample 14	24.98
True	255	H16	Sample 15	25
True	255	H17	Sample 16	26.03	25.9367								22.6	25.9367	3.33667	-5.67667	51.1502
True	255	H18	Sample 17	25.81
True	255	H19	Sample 18	25.97
True	255	H20	Sample 19	25.85	25.8533	main2						main2	23.0233	25.8533	2.83	-6.18333	72.6723	104.81	90.1187	22.9479	19.7313
True	255	H21	Sample 20	25.55
True	255	H22	Sample 21	26.16
True	255	I2	Sample 22	25.31	25.2533								23.11	25.2533	2.14333	-6.87	116.97
True	255	I3	Sample 23	25.17
True	255	I4	Sample 24	25.28
True	255	I5	Sample 25	25.26	25.2133								23.1633	25.2133	2.05	-6.96333	124.788
True	255	I6	Sample 26	25.24
True	255	I7	Sample 27	25.14
True	255	I8	Sample 28	30.91	30.9267	mail MYC						mail MYC	23.1367	30.9267	7.79	-1.22333	2.33486	1.78463	1.53447	0.477665	0.410709
True	255	I9	Sample 29	31.04
True	255	I10	Sample 30	30.83
True	255	I11	Sample 31	31	30.81								22.6833	30.81	8.12667	-0.886667	1.8489
True	255	I12	Sample 32	30.84
True	255	I13	Sample 33	30.59
True	255	I14	Sample 33	31.28	31.2233								22.4367	31.2233	8.78667	-0.226667	1.17013
True	255	I15	Sample 34	31.32
True	255	I16	Sample 35	31.07
True	255	I17	Sample 36	30.6	30.7267	mail FLAG						mail FLAG	22.4667	30.7267	8.26	-0.753333	1.68568	1.9533	1.6795	0.227755	0.19583
True	255	I18	Sample 37	30.57
True	255	I19	Sample 38	31.01
True	255	I20	Sample 39	31.02	31.005								23.1567	31.005	7.84833	-1.165	2.24233
True	255	I21	Sample 40	30.99
True	65280	I22	Sample 41
True	255	J2	Sample 42	32.22	31.5333								23.47	31.5333	8.06333	-0.95	1.93187
True	255	J3	Sample 43	31.15
True	255	J4	Sample 44	31.23
True	255	J5	Sample 45	31.89	31.8733	main MYC						main MYC	23.0267	31.8733	8.84667	-0.166667	1.12246	1.15079	0.989485	0.0533116	0.0458387
True	255	J6	Sample 46	31.86
True	255	J7	Sample 47	31.87
True	255	J8	Sample 48	31.29	31.41								22.69	31.41	8.72	-0.293333	1.22547
True	255	J9	Sample 49	31.48
True	255	J10	Sample 50	31.46
True	255	J11	Sample 51	32.47	32.1333								23.2633	32.1333	8.87	-0.143333	1.10445
True	255	J12	Sample 52	31.5
True	255	J13	Sample 53	32.43
True	255	J14	Sample 54	31.85	32.0333	main FLAG						main FLAG	22.7433	32.0333	9.29	0.276667	0.825496	0.731576	0.62903	0.0665242	0.0571993
True	255	J15	Sample 55	32.3
True	255	J16	Sample 56	31.95
True	255	J17	Sample 57	32.44	32.32								22.75	32.32	9.57	0.556667	0.679871
True	255	J18	Sample 58	32.27
True	255	J19	Sample 59	32.25
True	255	J20	Sample 60	32.59	32.5								22.95	32.5	9.55	0.536667	0.689362
True	255	J21	Sample 61	32.89
True	255	J22	Sample 62	32.02
Include	Color	Pos	Name	Cp	SHOC1	Concentration	Status						RHIP1	SHOC1	∂	∂∂		mean	normalized mean	std dev	normalized std dev
True	255	K2	Sample 1	31.29	31.4467	col						col	23.7533	31.4467	7.69333	0	1	1.1063	1	0.0886459	0.080128
True	255	K3	Sample 2	31.98
True	255	K4	Sample 3	31.07
True	255	K5	Sample 4	30.92	30.8467								23.4367	30.8467	7.41	-0.283333	1.217
True	255	K6	Sample 5	31.07
True	255	K7	Sample 6	30.55
True	255	K8	Sample 7	30.8	30.68								23.1267	30.68	7.55333	-0.14	1.10191
True	255	K9	Sample 8	30.63
True	255	K10	Sample 9	30.61
True	255	K11	Sample 10	27.45	27.47	mail1						mail1	22.9533	27.47	4.51667	-3.17667	9.04216	8.21559	7.42616	1.51463	1.36909
True	255	K12	Sample 11	27.45
True	255	K13	Sample 12	27.51
True	255	K14	Sample 13	27	26.9333								22.49	26.9333	4.44333	-3.25	9.51366
True	255	K15	Sample 14	26.89
True	255	K16	Sample 15	26.91
True	255	K17	Sample 16	27.66	27.6867								22.6	27.6867	5.08667	-2.60667	6.09095
True	255	K18	Sample 17	27.81
True	255	K19	Sample 18	27.59
True	255	K20	Sample 19	27.64	27.6033	main2						main2	23.0233	27.6033	4.58	-3.11333	8.6538	8.95465	8.09421	0.213426	0.192918
True	255	K21	Sample 20	27.72
True	255	K22	Sample 21	27.45
True	255	L2	Sample 22	27.58	27.6133								23.11	27.6133	4.50333	-3.19	9.12611
True	255	L3	Sample 23	27.7
True	255	L4	Sample 24	27.56
True	255	L5	Sample 25	27.64	27.6733								23.1633	27.6733	4.51	-3.18333	9.08404
True	255	L6	Sample 26	27.68
True	255	L7	Sample 27	27.7
True	255	L8	Sample 28	31.09	30.9267	mail MYC						mail MYC	23.1367	30.9267	7.79	0.0966667	0.935191	0.835545	0.755259	0.0721582	0.0652246
True	255	L9	Sample 29	30.86
True	255	L10	Sample 30	30.83
True	255	L11	Sample 31	30.67	30.69								22.6833	30.69	8.00667	0.313333	0.80478
True	255	L12	Sample 32	30.53
True	255	L13	Sample 33	30.87
True	255	L14	Sample 33	30.56	30.5133								22.4367	30.5133	8.07667	0.383333	0.766664
True	255	L15	Sample 34	30.43
True	255	L16	Sample 35	30.55
True	255	L17	Sample 36	30.32	30.3467	mail FLAG						mail FLAG	22.4667	30.3467	7.88	0.186667	0.878633	1.65819	1.49885	0.565724	0.511364
True	255	L18	Sample 37	30.09
True	255	L19	Sample 38	30.63
True	255	L20	Sample 39	29.77	29.71								23.1567	29.71	6.55333	-1.14	2.20381
True	255	L21	Sample 40	29.64
True	255	L22	Sample 41	29.72
True	255	M2	Sample 42	30.18	30.2433								23.47	30.2433	6.77333	-0.92	1.89212
True	255	M3	Sample 43	30.43
True	255	M4	Sample 44	30.12
True	255	M5	Sample 45	30.58	30.3933	main MYC						main MYC	23.0267	30.3933	7.36667	-0.326667	1.25411	1.08855	0.983951	0.199114	0.179981
True	255	M6	Sample 46	30.34
True	255	M7	Sample 47	30.26
True	255	M8	Sample 48	30.66	30.69								22.69	30.69	8	0.306667	0.808508
True	255	M9	Sample 49	30.92
True	255	M10	Sample 50	30.49
True	255	M11	Sample 51	30.72	30.69								23.2633	30.69	7.42667	-0.266667	1.20303
True	255	M12	Sample 52	30.35
True	255	M13	Sample 53	31
True	255	M14	Sample 54	30.26	30.2	main FLAG						main FLAG	22.7433	30.2	7.45667	-0.236667	1.17827	1.23056	1.11232	0.0573472	0.0518368
True	255	M15	Sample 55	30.29
True	255	M16	Sample 56	30.05
True	255	M17	Sample 57	30.04	30.1767								22.75	30.1767	7.42667	-0.266667	1.20303
True	255	M18	Sample 58	30.19
True	255	M19	Sample 59	30.3
True	255	M20	Sample 60	29.84	30.2533								22.95	30.2533	7.30333	-0.39	1.31039
True	255	M21	Sample 61	30.62
True	255	M22	Sample 62	30.3
Include	Color	Pos	Name	Cp	UNK	Concentration	Status						RHIP1	UNK	∂	∂∂		mean	normalized mean	std dev	normalized std dev
True	255	N2	Sample 1	28.01	27.99	col						col	23.7533	27.99	4.23667	0	1	1.0974	1	0.0694113	0.0632508
True	255	N3	Sample 2	27.91
True	255	N4	Sample 3	28.05
True	255	N5	Sample 4	27.5	27.49								23.4367	27.49	4.05333	-0.183333	1.1355
True	255	N6	Sample 5	27.47
True	255	N7	Sample 6	27.5
True	255	N8	Sample 7	27.08	27.1533								23.1267	27.1533	4.02667	-0.21	1.15669
True	255	N9	Sample 8	27.18
True	255	N10	Sample 9	27.2
True	255	N11	Sample 10	20.76	20.7567	mail1						mail1	22.9533	20.7567	-2.19667	-6.43333	86.4224	70.904	64.611	12.853	11.7123
True	255	N12	Sample 11	20.75
True	255	N13	Sample 12	20.76
True	255	N14	Sample 13	20.55	20.57								22.49	20.57	-1.92	-6.15667	71.3414
True	255	N15	Sample 14	20.61
True	255	N16	Sample 15	20.55
True	255	N17	Sample 16	21.2	21.0567								22.6	21.0567	-1.54333	-5.78	54.9482
True	255	N18	Sample 17	20.76
True	255	N19	Sample 18	21.21
True	255	N20	Sample 19	20.53	20.4067	main2						main2	23.0233	20.4067	-2.61667	-6.85333	115.627	116.384	106.055	9.67368	8.81511
True	255	N21	Sample 20	20.14
True	255	N22	Sample 21	20.55
True	255	O2	Sample 22	20.81	20.6333								23.11	20.6333	-2.47667	-6.71333	104.934
True	255	O3	Sample 23	20.55
True	255	O4	Sample 24	20.54
True	255	O5	Sample 25	20.33	20.3933								23.1633	20.3933	-2.77	-7.00667	128.593
True	255	O6	Sample 26	20.5
True	255	O7	Sample 27	20.35
True	255	O8	Sample 28	26.31	26.2533	mail MYC						mail MYC	23.1367	26.2533	3.11667	-1.12	2.17347	1.54987	1.41231	0.518784	0.47274
True	255	O9	Sample 29	26.2
True	255	O10	Sample 30	26.25
True	255	O11	Sample 31	26.31	26.2667								22.6833	26.2667	3.58333	-0.653333	1.5728
True	255	O12	Sample 32	26.26
True	255	O13	Sample 33	26.23
True	255	O14	Sample 33	26.76	26.82								22.4367	26.82	4.38333	0.146667	0.903335
True	255	O15	Sample 34	26.87
True	255	O16	Sample 35	26.83
True	255	O17	Sample 36	27.63	27.6667	mail FLAG						mail FLAG	22.4667	27.6667	5.2	0.963333	0.512871	0.536324	0.488724	0.0677527	0.0617395
True	255	O18	Sample 37	27.61
True	255	O19	Sample 38	27.76
True	255	O20	Sample 39	28.58	28.49								23.1567	28.49	5.33333	1.09667	0.467596
True	255	O21	Sample 40	28.28
True	255	O22	Sample 41	28.61
True	255	P2	Sample 42	28.35	28.3767								23.47	28.3767	4.90667	0.67	0.628507
True	255	P3	Sample 43	28.34
True	255	P4	Sample 44	28.44
True	255	P5	Sample 45	28.16	28.1	main MYC						main MYC	23.0267	28.1	5.07333	0.836667	0.559936	0.433467	0.394996	0.110931	0.101086
True	255	P6	Sample 46	28.07
True	255	P7	Sample 47	28.07
True	255	P8	Sample 48	28.64	28.7133								22.69	28.7133	6.02333	1.78667	0.289841
True	255	P9	Sample 49	28.76
True	255	P10	Sample 50	28.74
True	255	P11	Sample 51	28.53	28.65								23.2633	28.65	5.38667	1.15	0.450625
True	255	P12	Sample 52	28.73
True	255	P13	Sample 53	28.69
True	255	P14	Sample 54	28.22	28.2367	main FLAG						main FLAG	22.7433	28.2367	5.49333	1.25667	0.41851	0.446713	0.407066	0.116598	0.106249
True	255	P15	Sample 55	28.24
True	255	P16	Sample 56	28.25
True	255	P17	Sample 57	28.53	28.63								22.75	28.63	5.88	1.64333	0.320116
True	255	P18	Sample 58	28.63
True	255	P19	Sample 59	28.73
True	255	P20	Sample 60	28.25	27.92								22.95	27.92	4.97	0.733333	0.601513
True	255	P21	Sample 61	27.61
True	255	P22	Sample 62	27.9

## Sheet: fig 5E
Experiment: exp3544 Selected Filter: SYBR Green I / HRM Dye (465-510)
Include	Color	Pos	Name	Cp	RHIP1	Status
True	255	B1	Sample 1	22.7	22.75	1	col rep1
True	255	B2	Sample 2	22.52
True	255	B3	Sample 3	23.03
True	255	B4	Sample 4	22.79	22.8367	2	col rep2
True	255	B5	Sample 5	22.56
True	255	B6	Sample 6	23.16
True	255	B7	Sample 7	22.79	22.86	3	col rep3
True	255	B8	Sample 8	22.55
True	255	B9	Sample 9	23.24
True	255	B10	Sample 10	21.95	21.9067	4	main-2 rep1
True	255	B11	Sample 11	21.78
True	255	B12	Sample 12	21.99
True	255	B13	Sample 13	20.84	21.02	5	main-2 rep2
True	255	B14	Sample 14	21.28
True	255	B15	Sample 15	20.94
True	255	B16	Sample 16	21.44	21.6133	6	main-2 rep3
True	255	B17	Sample 17	21.85
True	255	B18	Sample 18	21.55
True	255	B19	Sample 19	21.13	21.31	7	mail1-1 rep1
True	255	B20	Sample 20	21.55
True	255	B21	Sample 21	21.25
True	255	B22	Sample 22	21.52	21.5	8	mail1-1 rep2
True	255	B23	Sample 23	21.44
True	255	B24	Sample 24	21.54
True	255	C1	Sample 25	22.06	21.9433	9	mail1-1 rep3
True	255	C2	Sample 26	22.02
True	255	C3	Sample 27	21.75
True	255	C4	Sample 28	22.2	22.1733	10	MAIN FLAG 7 rep1
True	255	C5	Sample 29	22.05
True	255	C6	Sample 30	22.27
True	255	C7	Sample 31	21.14	21.1933	11	MAIN FLAG 7 rep2
True	255	C8	Sample 32	21.23
True	255	C9	Sample 33	21.21
True	255	C10	Sample 34	22.27	22.3933	12	MAIN FLAG 7 rep3
True	255	C11	Sample 35	22.56
True	255	C12	Sample 36	22.35
True	255	C13	Sample 37	22.08	22.0433	13	MAIN MYC 5 rep1
True	255	C14	Sample 38	22.07
True	255	C15	Sample 39	21.98
True	255	C16	Sample 40	21.66	21.84	14	MAIN MYC 5 rep2
True	255	C17	Sample 41	21.92
True	255	C18	Sample 42	21.94
True	255	C19	Sample 43	22.9	22.6633	15	MAIN MYC 5 rep3
True	255	C20	Sample 44	22.32
True	255	C21	Sample 45	22.77
True	255	C22	Sample 46	23.03	23.08	16	MAIL1 FLAG 4 rep1
True	255	C23	Sample 47	22.93
True	255	C24	Sample 48	23.28
True	255	D1	Sample 49	22.89	23.0167	17	MAIL1 FLAG 4 rep2
True	255	D2	Sample 50	22.97
True	255	D3	Sample 51	23.19
True	255	D4	Sample 52	22.74	22.87	18	MAIL1 FLAG 4 rep3
True	255	D5	Sample 53	22.87
True	255	D6	Sample 54	23
True	255	D7	Sample 55	21.73	21.66	19	MAIL1 MYC 4 rep1
True	255	D8	Sample 56	21.69
True	255	D9	Sample 57	21.56
True	255	D10	Sample 58	21.48	21.53	20	MAIL1 MYC 4 rep2
True	255	D11	Sample 59	21.57
True	255	D12	Sample 60	21.54
True	255	D13	Sample 61	21.66	21.7	21	MAIL1 MYC 4 rep3
True	255	D14	Sample 62	21.73
True	255	D15	Sample 63	21.71
Include	Color	Pos	Name	Cp	HAC4	Concentration	Status						RHIP1	HAC4	∂	∂∂		mean	normalized mean	std dev	normalized std dev
True	255	H1	Sample 1	25.84	25.97	1	col rep1				1	col	22.75	25.97	3.22	0	1	1.12019	1	0.0909116	0.081157
True	255	H2	Sample 2	26.11
True	255	H3	Sample 3	25.96
True	255	H4	Sample 4	25.75	25.8667	2	col rep2				2		22.8367	25.8667	3.03	-0.19	1.14076
True	255	H5	Sample 5	26.1
True	255	H6	Sample 6	25.75
True	255	H7	Sample 7	25.73	25.7933	3	col rep3				3		22.86	25.7933	2.93333	-0.286667	1.21982
True	255	H8	Sample 8	25.85
True	255	H9	Sample 9	25.8
True	255	H10	Sample 10	30.55	30.81	4	main-2 rep1				4	main-2	21.9067	30.81	8.90333	5.68333	0.0194602	0.0236283	0.021093	0.0140139	0.0125102
True	255	H11	Sample 11	31.15
True	255	H12	Sample 12	30.73
True	255	H13	Sample 13	30.88	31.0467	5	main-2 rep2				5		21.02	31.0467	10.0267	6.80667	0.00893283
True	255	H14	Sample 14	31.67
True	255	H15	Sample 15	30.59
True	255	H16	Sample 16	29.64	29.39	6	main-2 rep3				6		21.6133	29.39	7.77667	4.55667	0.0424919
True	255	H17	Sample 17	29.26
True	255	H18	Sample 18	29.27
True	255	H19	Sample 19	29.97	29.76	7	mail1-1 rep1				7	mail1-1	21.31	29.76	8.45	5.23	0.0266448	0.0247631	0.022106	0.017189	0.0153446
True	255	H20	Sample 20	30.13
True	255	H21	Sample 21	29.18
True	255	H22	Sample 22	28.99	29.2	8	mail1-1 rep2				8		21.5	29.2	7.7	4.48	0.0448111
True	255	H23	Sample 23	29.49
True	255	H24	Sample 24	29.12
True	255	I1	Sample 25	35	33.6267	9	mail1-1 rep3				9		21.9433	33.6267	11.6833	8.46333	0.00283324
True	255	I2	Sample 26	35
True	255	I3	Sample 27	30.88
True	255	I4	Sample 28	25.59	25.9833	10	MAIN FLAG 7 rep1				10	MAIN FLAG 7	22.1733	25.9833	3.81	0.59	0.664343	0.830031	0.740971	0.264293	0.235935
True	255	I5	Sample 29	26.43
True	255	I6	Sample 30	25.93
True	255	I7	Sample 31	25.42	25.0967	11	MAIN FLAG 7 rep2				11		21.1933	25.0967	3.90333	0.683333	0.622725
True	255	I8	Sample 32	25.19
True	255	I9	Sample 33	24.68
True	255	I10	Sample 34	25.15	25.3467	12	MAIN FLAG 7 rep3				12		22.3933	25.3467	2.95333	-0.266667	1.20303
True	255	I11	Sample 35	25.46
True	255	I12	Sample 36	25.43
True	255	I13	Sample 37	25.63	25.49	13	MAIN MYC 5 rep1				13	MAIN MYC 5	22.0433	25.49	3.44667	0.226667	0.854607	1.25795	1.12297	0.46233	0.412723
True	255	I14	Sample 38	25.62
True	255	I15	Sample 39	25.22
True	255	I16	Sample 40	25.14	25.04	14	MAIN MYC 5 rep2				14		21.84	25.04	3.2	-0.02	1.01396
True	255	I17	Sample 41	25.06
True	255	I18	Sample 42	24.92
True	255	I19	Sample 43	25.31	24.9533	15	MAIN MYC 5 rep3				15		22.6633	24.9533	2.29	-0.93	1.90528
True	255	I20	Sample 44	24.99
True	255	I21	Sample 45	24.56
True	255	I22	Sample 46	25.49	25.5267	16	MAIL1 FLAG 4 rep1				16	MAIL1 FLAG 4	23.08	25.5267	2.44667	-0.773333	1.70921	1.61992	1.44611	0.0732522	0.0653924
True	255	I23	Sample 47	25.54
True	255	I24	Sample 48	25.55
True	255	J1	Sample 49	25.56	25.54	17	MAIL1 FLAG 4 rep2				17		23.0167	25.54	2.52333	-0.696667	1.62076
True	255	J2	Sample 50	25.57
True	255	J3	Sample 51	25.49
True	255	J4	Sample 52	25.43	25.4767	18	MAIL1 FLAG 4 rep3				18		22.87	25.4767	2.60667	-0.613333	1.52979
True	255	J5	Sample 53	25.5
True	255	J6	Sample 54	25.5
True	255	J7	Sample 55	25.03	24.84	19	MAIL1 MYC 4 rep1				19	MAIL1 MYC 4	21.66	24.84	3.18	-0.04	1.02811	1.05901	0.945377	0.221267	0.197526
True	255	J8	Sample 56	24.82
True	255	J9	Sample 57	24.67
True	255	J10	Sample 58	25.11	25.0633	20	MAIL1 MYC 4 rep2				20		21.53	25.0633	3.53333	0.313333	0.80478
True	255	J11	Sample 59	25.11
True	255	J12	Sample 60	24.97
True	255	J13	Sample 61	24.5	24.4933	21	MAIL1 MYC 4 rep3				21		21.7	24.4933	2.79333	-0.426667	1.34412
True	255	J14	Sample 62	24.45
True	255	J15	Sample 63	24.53
Include	Color	Pos	Name	Cp	MKK3	Concentration	Status						RHIP1	MKK3	∂	∂∂		mean	normalized mean	std dev	normalized std dev
True	255	E1	Sample 1	24.67	24.64	1	col rep1				1	col	22.75	24.64	1.89	0	1	1.01191	1	0.0468022	0.0462512
True	255	E2	Sample 2	24.63
True	255	E3	Sample 3	24.62
True	255	E4	Sample 4	24.87	24.7833	2	col rep2				2		22.8367	24.7833	1.94667	0.0566667	0.961483
True	255	E5	Sample 5	24.78
True	255	E6	Sample 6	24.7
True	255	E7	Sample 7	24.78	24.6467	3	col rep3				3		22.86	24.6467	1.78667	-0.103333	1.07425
True	255	E8	Sample 8	24.61
True	255	E9	Sample 9	24.55
True	255	E10	Sample 10	31.01	31.5767	4	main-2 rep1				4	main-2	21.9067	31.5767	9.67	7.78	0.00454974	0.00363699	0.00359418	0.000646776	0.000639163
True	255	E11	Sample 11	31.74
True	255	E12	Sample 12	31.98
True	255	E13	Sample 13	31.01	31.1833	5	main-2 rep2				5		21.02	31.1833	10.1633	8.27333	0.00323205
True	255	E14	Sample 14	30.94
True	255	E15	Sample 15	31.6
True	255	E16	Sample 16	32.14	31.8233	6	main-2 rep3				6		21.6133	31.8233	10.21	8.32	0.00312918
True	255	E17	Sample 17	31.6
True	255	E18	Sample 18	31.73
True	255	E19	Sample 19	30.99	31.2267	7	mail1-1 rep1				7	mail1-1	21.31	31.2267	9.91667	8.02667	0.00383471	0.0050479	0.00498848	0.000890742	0.000880257
True	255	E20	Sample 20	31.92
True	255	E21	Sample 21	30.77
True	255	E22	Sample 22	30.89	30.7833	8	mail1-1 rep2				8		21.5	30.7833	9.28333	7.39333	0.00594819
True	255	E23	Sample 23	30.62
True	255	E24	Sample 24	30.84
True	255	F1	Sample 25	31.89	31.3767	9	mail1-1 rep3				9		21.9433	31.3767	9.43333	7.54333	0.00536081
True	255	F2	Sample 26	31.13
True	255	F3	Sample 27	31.11
True	255	F4	Sample 28	23.97	23.96	10	MAIN FLAG 7 rep1				10	MAIN FLAG 7	22.1733	23.96	1.78667	-0.103333	1.07425	1.21778	1.20344	0.102905	0.101694
True	255	F5	Sample 29	23.97
True	255	F6	Sample 30	23.94
True	255	F7	Sample 31	22.74	22.74	11	MAIN FLAG 7 rep2				11		21.1933	22.74	1.54667	-0.343333	1.26868
True	255	F8	Sample 32	22.68
True	255	F9	Sample 33	22.8
True	255	F10	Sample 34	23.85	23.8933	12	MAIN FLAG 7 rep3				12		22.3933	23.8933	1.5	-0.39	1.31039
True	255	F11	Sample 35	23.84
True	255	F12	Sample 36	23.99
True	255	F13	Sample 37	23.73	23.7033	13	MAIN MYC 5 rep1				13	MAIN MYC 5	22.0433	23.7033	1.66	-0.23	1.17283	1.27256	1.25758	0.113053	0.111722
True	255	F14	Sample 38	23.71
True	255	F15	Sample 39	23.67
True	255	F16	Sample 40	23.56	23.45	14	MAIN MYC 5 rep2				14		21.84	23.45	1.61	-0.28	1.21419
True	255	F17	Sample 41	23.32
True	255	F18	Sample 42	23.47
True	255	F19	Sample 43	24.04	24.0367	15	MAIN MYC 5 rep3				15		22.6633	24.0367	1.37333	-0.516667	1.43065
True	255	F20	Sample 44	24.15
True	255	F21	Sample 45	23.92
True	255	F22	Sample 46	24.73	24.59	16	MAIL1 FLAG 4 rep1				16	MAIL1 FLAG 4	23.08	24.59	1.51	-0.38	1.30134	1.47407	1.45672	0.124672	0.123204
True	255	F23	Sample 47	24.61
True	255	F24	Sample 48	24.43
True	255	G1	Sample 49	24.45	24.2933	17	MAIL1 FLAG 4 rep2				17		23.0167	24.2933	1.27667	-0.613333	1.52979
True	255	G2	Sample 50	24.28
True	255	G3	Sample 51	24.15
True	255	G4	Sample 52	24.12	24.09	18	MAIL1 FLAG 4 rep3				18		22.87	24.09	1.22	-0.67	1.59107
True	255	G5	Sample 53	24.08
True	255	G6	Sample 54	24.07
True	255	G7	Sample 55	23.63	23.4467	19	MAIL1 MYC 4 rep1				19	MAIL1 MYC 4	21.66	23.4467	1.78667	-0.103333	1.07425	1.04064	1.02839	0.05291	0.0522871
True	255	G8	Sample 56	23.16
True	255	G9	Sample 57	23.55
True	255	G10	Sample 58	23.33	23.47	20	MAIL1 MYC 4 rep2				20		21.53	23.47	1.94	0.05	0.965936
True	255	G11	Sample 59	23.57
True	255	G12	Sample 60	23.51
True	255	G13	Sample 61	23.53	23.4767	21	MAIL1 MYC 4 rep3				21		21.7	23.4767	1.77667	-0.113333	1.08172
True	255	G14	Sample 62	23.3
True	255	G15	Sample 63	23.6
Include	Color	Pos	Name	Cp	FAP3	Concentration	Status						RHIP1	FAP3	∂	∂∂		mean	normalized mean	std dev	normalized std dev
True	255	K1	Sample 1	22.28	22.2833	1	col rep1				1	col	22.75	22.2833	-0.466667	0	1	0.990161	1	0.0155783	0.0157331
True	255	K2	Sample 2	22.31
True	255	K3	Sample 3	22.26
True	255	K4	Sample 4	22.5	22.4167	2	col rep2				2		22.8367	22.4167	-0.42	0.0466667	0.968171
True	255	K5	Sample 5	22.33
True	255	K6	Sample 6	22.42
True	255	K7	Sample 7	22.51	22.39	3	col rep3				3		22.86	22.39	-0.47	-0.00333333	1.00231
True	255	K8	Sample 8	22.33
True	255	K9	Sample 9	22.33
True	255	K10	Sample 10	29.77	30.0367	4	main-2 rep1				4	main-2	21.9067	30.0367	8.13	8.59667	0.00258313	0.00276	0.00278742	0.000455535	0.000460061
True	255	K11	Sample 11	29.84
True	255	K12	Sample 12	30.5
True	255	K13	Sample 13	29.17	29.31	5	main-2 rep2				5		21.02	29.31	8.29	8.75667	0.00231196
True	255	K14	Sample 14	29.16
True	255	K15	Sample 15	29.6
True	255	K16	Sample 16	29.5	29.3533	6	main-2 rep3				6		21.6133	29.3533	7.74	8.20667	0.00338491
True	255	K17	Sample 17	29.3
True	255	K18	Sample 18	29.26
True	255	K19	Sample 19	28.89	28.91	7	mail1-1 rep1				7	mail1-1	21.31	28.91	7.6	8.06667	0.00372985	0.00400819	0.00404801	0.000467606	0.000472253
True	255	K20	Sample 20	28.77
True	255	K21	Sample 21	29.07
True	255	K22	Sample 22	28.88	28.7767	8	mail1-1 rep2				8		21.5	28.7767	7.27667	7.74333	0.00466686
True	255	K23	Sample 23	28.69
True	255	K24	Sample 24	28.76
True	255	L1	Sample 25	29.78	29.5833	9	mail1-1 rep3				9		21.9433	29.5833	7.64	8.10667	0.00362786
True	255	L2	Sample 26	29.55
True	255	L3	Sample 27	29.42
True	255	L4	Sample 28	21.58	21.4667	10	MAIN FLAG 7 rep1				10	MAIN FLAG 7	22.1733	21.4667	-0.706667	-0.24	1.18099	1.07243	1.08308	0.114663	0.115802
True	255	L5	Sample 29	21.48
True	255	L6	Sample 30	21.34
True	255	L7	Sample 31	20.5	20.56	11	MAIN FLAG 7 rep2				11		21.1933	20.56	-0.633333	-0.166667	1.12246
True	255	L8	Sample 32	20.45
True	255	L9	Sample 33	20.73
True	255	L10	Sample 34	21.59	22.0567	12	MAIN FLAG 7 rep3				12		22.3933	22.0567	-0.336667	0.13	0.913831
True	255	L11	Sample 35	22.93
True	255	L12	Sample 36	21.65
True	255	L13	Sample 37	21.44	21.2933	13	MAIN MYC 5 rep1				13	MAIN MYC 5	22.0433	21.2933	-0.75	-0.283333	1.217	1.36994	1.38355	0.188702	0.190577
True	255	L14	Sample 38	21.28
True	255	L15	Sample 39	21.16
True	255	L16	Sample 40	20.61	20.6633	14	MAIN MYC 5 rep2				14		21.84	20.6633	-1.17667	-0.71	1.6358
True	255	L17	Sample 41	20.69
True	255	L18	Sample 42	20.69
True	255	L19	Sample 43	21.88	21.8667	15	MAIN MYC 5 rep3				15		22.6633	21.8667	-0.796667	-0.33	1.25701
True	255	L20	Sample 44	21.88
True	255	L21	Sample 45	21.84
True	255	L22	Sample 46	22.86	22.8033	16	MAIL1 FLAG 4 rep1				16	MAIL1 FLAG 4	23.08	22.8033	-0.276667	0.19	0.876606	1.02744	1.03765	0.113033	0.114156
True	255	L23	Sample 47	22.85
True	255	L24	Sample 48	22.7
True	255	M1	Sample 49	22.5	22.47	17	MAIL1 FLAG 4 rep2				17		23.0167	22.47	-0.546667	-0.08	1.05702
True	255	M2	Sample 50	22.49
True	255	M3	Sample 51	22.42
True	255	M4	Sample 52	22.18	22.2033	18	MAIL1 FLAG 4 rep3				18		22.87	22.2033	-0.666667	-0.2	1.1487
True	255	M5	Sample 53	22.24
True	255	M6	Sample 54	22.19
True	255	M7	Sample 55	22.31	22.3467	19	MAIL1 MYC 4 rep1				19	MAIL1 MYC 4	21.66	22.3467	0.686667	1.15333	0.449585	0.716301	0.723418	0.199916	0.201903
True	255	M8	Sample 56	22.47
True	255	M9	Sample 57	22.26
True	255	M10	Sample 58	21.09	21.1667	20	MAIL1 MYC 4 rep2				20		21.53	21.1667	-0.363333	0.103333	0.93088
True	255	M11	Sample 59	21.33
True	255	M12	Sample 60	21.08
True	255	M13	Sample 61	21.52	21.6133	21	MAIL1 MYC 4 rep3				21		21.7	21.6133	-0.0866667	0.38	0.768438
True	255	M14	Sample 62	21.68
True	255	M15	Sample 63	21.64

## Sheet: fig 6D
Primers	Sample	Cp	Mean Cp
RHIP1	Col 1	25.07	25.25
	Col 1	25.59
	Col 1	25.09
	Col 2	25.93	25.465
	Col 2
	Col 2	25
	Col 3	26.04	26.035
	Col 3	26.03
	Col 3	25.2
	mail1-1 1	25.51	25.5633
	mail1-1 1	25.99
	mail1-1 1	25.19
	mail1-1 2	25.86	25.4667
	mail1-1 2	25.53
	mail1-1 2	25.01
	mail1-1 3	32.9	25.045
	mail1-1 3	25.26
	mail1-1 3	24.83
	pp7l-2 1	26.33	25.4167
	pp7l-2 1	25.06
	pp7l-2 1	24.86
	pp7l-2 2	25.09	25.05
	pp7l-2 2	24.97
	pp7l-2 2	25.09
	pp7l-2 3	25.03	25.03
	pp7l-2 3	25.03
	pp7l-2 3	25.03
	mail1-1 pp7l-2 1	25.05	25.0433
	mail1-1 pp7l-2 1	24.98
	mail1-1 pp7l-2 1	25.1
	mail1-1 pp7l-2 2	25.28	25.2833
	mail1-1 pp7l-2 2	25.35
	mail1-1 pp7l-2 2	25.22
	mail1-1 pp7l-2 3	25.06	24.99
	mail1-1 pp7l-2 3	24.88
	mail1-1 pp7l-2 3	25.03
	main-2 1	24.35	24.4267
	main-2 1	24.49
	main-2 1	24.44
	main-2 2	24.98	24.8367
	main-2 2	24.56
	main-2 2	24.97
	main-2 3	25.05	25.1
	main-2 3	25.12
	main-2 3	25.13		∂	∂∂	fold change	mean fc	mean norm	sdt dev	sdt dev norm
ATCOPIA28	Col 1	36.56	35.5	10.25	0	1	1.85891	1	1.41002	0.758521
	Col 1	34.3
	Col 1	35.64
	Col 2	33.75	35.59	10.125	-0.125	1.09051
	Col 2	36.39
	Col 2	36.63
	Col 3	33.57	34.4833	8.44833	-1.80167	3.48623
	Col 3	34.8
	Col 3	35.08
	mail1-1 1	27.6	27.62	2.05667	-8.19333	292.711	222.403	119.642	74.201	39.9164
	mail1-1 1	27.6
	mail1-1 1	27.66
	mail1-1 2	27.84	27.8733	2.40667	-7.84333	229.656
	mail1-1 2	27.91
	mail1-1 2	27.87
	mail1-1 3	28.09	28.1167	3.07167	-7.17833	144.842
	mail1-1 3	28.16
	mail1-1 3	28.1
	pp7l-2 1	27.69	27.7233	2.30667	-7.94333	246.14	222.65	119.774	106.95	57.5334
	pp7l-2 1	27.71
	pp7l-2 1	27.77
	pp7l-2 2	28.47	28.5733	3.52333	-6.72667	105.908
	pp7l-2 2	28.58
	pp7l-2 2	28.67
	pp7l-2 3	26.96	26.9767	1.94667	-8.30333	315.902
	pp7l-2 3	27
	pp7l-2 3	26.97
	mail1-1 pp7l-2 1	30.32	29.8333	4.79	-5.46	44.0173	116.569	62.7082	63.0694	33.9281
	mail1-1 pp7l-2 1	29.29
	mail1-1 pp7l-2 1	29.89
	mail1-1 pp7l-2 2	28.26	28.2267	2.94333	-7.30667	158.316
	mail1-1 pp7l-2 2	28.29
	mail1-1 pp7l-2 2	28.13
	mail1-1 pp7l-2 3	28.11	28.0367	3.04667	-7.20333	147.374
	mail1-1 pp7l-2 3	27.97
	mail1-1 pp7l-2 3	28.03
	main-2 1	27.64	27.5633	3.13667	-7.11333	138.461	121.612	65.421	36.8574	19.8274
	main-2 1	27.51
	main-2 1	27.54
	main-2 2	27.87	27.8867	3.05	-7.2	147.033
	main-2 2	27.91
	main-2 2	27.88
	main-2 3	29	29.04	3.94	-6.31	79.3413
	main-2 3	28.94
	main-2 3	29.18
HELITRONY1D	Col 1	40	40	14.75	0	1	1.2946	1	0.379686	0.293285
	Col 1	40
	Col 1	40
	Col 2	40	40	14.535	-0.215	1.1607
	Col 2	40
	Col 2	40
	Col 3	40	40	13.965	-0.785	1.72309
	Col 3	40
	Col 3	40
	mail1-1 1	37.82	36.42	10.8567	-3.89333	14.8597	12.0566	9.313	13.7102	10.5903
	mail1-1 1	36.57
	mail1-1 1	36.27
	mail1-1 2	37.37	35.075	9.60833	-5.14167	35.3017
	mail1-1 2	35.26
	mail1-1 2	34.89
	mail1-1 3	36.51	36.585	11.54	-3.21	9.25351
	mail1-1 3	40
	mail1-1 3	36.66
	pp7l-2 1	40	36.305	10.8883	-3.86167	14.5371	10.6949	8.26116	17.5814	13.5806
	pp7l-2 1	35.49
	pp7l-2 1	37.12
	pp7l-2 2	36.86	37.0233	11.9733	-2.77667	6.85267
	pp7l-2 2	37.36
	pp7l-2 2	36.85
	pp7l-2 3	36.1	34.4433	9.41333	-5.33667	40.4107
	pp7l-2 3	33.22
	pp7l-2 3	34.01
	mail1-1 pp7l-2 1	40	37.515	12.4717	-2.27833	4.85117	22.6507	17.4963	12.3013	9.50205
	mail1-1 pp7l-2 1	37.33
	mail1-1 pp7l-2 1	37.7
	mail1-1 pp7l-2 2	37.33	35.155	9.87167	-4.87833	29.412
	mail1-1 pp7l-2 2	35.26
	mail1-1 pp7l-2 2	35.05
	mail1-1 pp7l-2 3	40	35.75	10.76	-3.99	15.8895
	mail1-1 pp7l-2 3	36.44
	mail1-1 pp7l-2 3	35.06
	main-2 1	35.57	35.63	11.2033	-3.54667	11.6857	12.0117	9.2783	4.42563	3.41854
	main-2 1	36.54
	main-2 1	35.69
	main-2 2	38.21	37.46	12.6233	-2.12667	4.36707
	main-2 2	37.63
	main-2 2	36.54
	main-2 3	37.13	36.225	11.125	-3.625	12.3377
	main-2 3	35.9
	main-2 3	36.55
ATMU1	Col 1	29.71	29.7867	4.53667	0	1	1.52748	1	0.492299	0.322295
	Col 1	29.88
	Col 1	29.77
	Col 2	29.16	29.3167	3.85167	-0.685	1.6077
	Col 2	29.63
	Col 2	29.16
	Col 3	29.54	29.59	3.555	-0.981667	1.97475
	Col 3	29.76
	Col 3	29.47
	mail1-1 1	23.1	23.0833	-2.48	-7.01667	129.487	152.982	100.153	57.8261	37.8571
	mail1-1 1	23.14
	mail1-1 1	23.01
	mail1-1 2	22.62	22.54	-2.92667	-7.46333	176.477
	mail1-1 2	22.5
	mail1-1 2	22.5
	mail1-1 3	23.62	23.64	-1.405	-5.94167	61.4639
	mail1-1 3	23.68
	mail1-1 3	23.62
	pp7l-2 1	24.52	24.4533	-0.963333	-5.5	45.2548	56.0635	36.7032	22.8668	14.9702
	pp7l-2 1	24.5
	pp7l-2 1	24.34
	pp7l-2 2	25.18	25.1833	0.133333	-4.40333	21.161
	pp7l-2 2	25.2
	pp7l-2 2	25.17
	pp7l-2 3	23.53	23.5033	-1.52667	-6.06333	66.8721
	pp7l-2 3	23.51
	pp7l-2 3	23.47
	mail1-1 pp7l-2 1	23.73	23.7433	-1.3	-5.83667	57.1494	110.926	72.6199	32.8498	21.5058
	mail1-1 pp7l-2 1	23.81
	mail1-1 pp7l-2 1	23.69
	mail1-1 pp7l-2 2	22.93	22.8933	-2.39	-6.92667	121.656
	mail1-1 pp7l-2 2	22.88
	mail1-1 pp7l-2 2	22.87
	mail1-1 pp7l-2 3	22.94	22.88	-2.11	-6.64667	100.195
	mail1-1 pp7l-2 3	22.87
	mail1-1 pp7l-2 3	22.83
	main-2 1	24.47	24.4467	0.02	-4.51667	22.8903	60.0812	39.3335	21.5314	14.096
	main-2 1	24.43
	main-2 1	24.44
	main-2 2	23.46	23.4267	-1.41	-5.94667	61.6773
	main-2 2	23.36
	main-2 2	23.46
	main-2 3	23.8	23.7667	-1.33333	-5.87	58.4852
	main-2 3	23.74
	main-2 3	23.76
MKK3	Col 1	26.94	27.0633	1.81333	0	1	1.20643	1	0.194676	0.161366
	Col 1	27.02
	Col 1	27.23
	Col 2	26.95	26.9767	1.51167	-0.301667	1.23257
	Col 2	26.94
	Col 2	27.04
	Col 3	27.3	27.3767	1.34167	-0.471667	1.38671
	Col 3	27.57
	Col 3	27.26
	mail1-1 1	35.89	36.8433	11.28	9.46667	0.00141335	0.00263281	0.00218232	0.00107094	0.000887693
	mail1-1 1	35.97
	mail1-1 1	38.67
	mail1-1 2	35.67	35.63	10.1633	8.35	0.00306478
	mail1-1 2	34.83
	mail1-1 2	36.39
	mail1-1 3	35.25	35.05	10.005	8.19167	0.00342029
	mail1-1 3	34.85
	mail1-1 3	35.05
	pp7l-2 1	38.41	36.7267	11.31	9.49667	0.00138426	0.0028361	0.00235083	0.00125905	0.00104362
	pp7l-2 1	36.13
	pp7l-2 1	35.64
	pp7l-2 2	34.06	34.97	9.92	8.10667	0.00362786
	pp7l-2 2	35.71
	pp7l-2 2	35.14
	pp7l-2 3	35.91	35.0033	9.97333	8.16	0.00349619
	pp7l-2 3	34.45
	pp7l-2 3	34.65
	mail1-1 pp7l-2 1	35.07	34.8367	9.79333	7.98	0.00396078	0.00350304	0.00290365	0.00109453	0.00090725
	mail1-1 pp7l-2 1	35.25
	mail1-1 pp7l-2 1	34.19
	mail1-1 pp7l-2 2	35.56	34.96	9.67667	7.86333	0.00429438
	mail1-1 pp7l-2 2	34.74
	mail1-1 pp7l-2 2	34.58
	mail1-1 pp7l-2 3	35.17	35.5967	10.6067	8.79333	0.00225394
	mail1-1 pp7l-2 3	35.44
	mail1-1 pp7l-2 3	36.18
	main-2 1	37.14	36.3333	11.9067	10.0933	0.000915385	0.00117216	0.000971598	0.000222395	0.000184342
	main-2 1	35.93
	main-2 1	35.93
	main-2 2		36.24	11.4033	9.59	0.00129754
	main-2 2	36.06
	main-2 2	36.42
	main-2 3	36.01	36.4967	11.3967	9.58333	0.00130355
	main-2 3	36.84
	main-2 3	36.64
FAP3	Col 1	27.56	27.69	2.44	0	1	1.3318	1	0.334148	0.2509
	Col 1	27.74
	Col 1	27.77
	Col 2	27.43	27.4967	2.03167	-0.408333	1.32715
	Col 2	27.63
	Col 2	27.43
	Col 3	27.72	27.7367	1.70167	-0.738333	1.66825
	Col 3	27.76
	Col 3	27.73
	mail1-1 1	33.16	33.5333	7.97	5.53	0.0216423	0.0182326	0.0136902	0.00296584	0.00222695
	mail1-1 1	33.54
	mail1-1 1	33.9
	mail1-1 2	33.14	33.85	8.38333	5.94333	0.0162509
	mail1-1 2	33.2
	mail1-1 2	35.21
	mail1-1 3	33.42	33.38	8.335	5.895	0.0168046
	mail1-1 3	33.2
	mail1-1 3	33.52
	pp7l-2 1	33.94	33.6567	8.24	5.8	0.0179484	0.0142506	0.0107003	0.00320291	0.00240495
	pp7l-2 1	33.06
	pp7l-2 1	33.97
	pp7l-2 2	34.1	33.8167	8.76667	6.32667	0.012459
	pp7l-2 2	33.16
	pp7l-2 2	34.19
	pp7l-2 3	33.98	33.81	8.78	6.34	0.0123444
	pp7l-2 3	34.02
	pp7l-2 3	33.43
	mail1-1 pp7l-2 1	32.78	32.3733	7.33	4.89	0.0337259	0.0299784	0.0225097	0.00642347	0.00482315
	mail1-1 pp7l-2 1	32.02
	mail1-1 pp7l-2 1	32.32
	mail1-1 pp7l-2 2	32.95	33.1933	7.91	5.47	0.0225614
	mail1-1 pp7l-2 2	33.56
	mail1-1 pp7l-2 2	33.07
	mail1-1 pp7l-2 3	32.1	32.3233	7.33333	4.89333	0.033648
	mail1-1 pp7l-2 3	32.05
	mail1-1 pp7l-2 3	32.82
	main-2 1	32.55	33.2933	8.86667	6.42667	0.0116247	0.0186225	0.013983	0.00699695	0.00525375
	main-2 1	33.76
	main-2 1	33.57
	main-2 2	32.3	32.5633	7.72667	5.28667	0.0256186
	main-2 2	32.75
	main-2 2	32.64
	main-2 3	33.07	33.2867	8.18667	5.74667	0.0186243
	main-2 3	32.97
	main-2 3	33.82
HAC4	Col 1	24.59	24.7	-0.55	0	1	1.21409	1	0.196663	0.161983
	Col 1	24.86
	Col 1	24.65
	Col 2	24.56	24.5867	-0.878333	-0.328333	1.25556
	Col 2	24.64
	Col 2	24.56
	Col 3	24.9	25.0133	-1.02167	-0.471667	1.38671
	Col 3	24.91
	Col 3	25.23
	mail1-1 1	35.3	35.23	9.66667	10.2167	0.000840382	0.000995755	0.000820166	0.000164495	0.000135488
	mail1-1 1	35.49
	mail1-1 1	34.9
	mail1-1 2	34.52	34.9133	9.44667	9.99667	0.000978821
	mail1-1 2	34.09
	mail1-1 2	36.13
	mail1-1 3	35.06	34.2367	9.19167	9.74167	0.00116806
	mail1-1 3	33.7
	mail1-1 3	33.95
	pp7l-2 1	34.28	34.5333	9.11667	9.66667	0.00123039	0.00174063	0.00143369	0.000617376	0.000508509
	pp7l-2 1	34.67
	pp7l-2 1	34.65
	pp7l-2 2	33.78	33.82	8.77	9.32	0.00156459
	pp7l-2 2	34.13
	pp7l-2 2	33.55
	pp7l-2 3	32.96	33.1667	8.13667	8.68667	0.0024269
	pp7l-2 3	33.43
	pp7l-2 3	33.11
	mail1-1 pp7l-2 1	34.03	34.85	9.80667	10.3567	0.000762663	0.00141241	0.00116334	0.000864432	0.000712
	mail1-1 pp7l-2 1	35.21
	mail1-1 pp7l-2 1	35.31
	mail1-1 pp7l-2 2	35.69	34.5867	9.30333	9.85333	0.00108106
	mail1-1 pp7l-2 2	34.2
	mail1-1 pp7l-2 2	33.87
	mail1-1 pp7l-2 3	33.74	33.1467	8.15667	8.70667	0.00239349
	mail1-1 pp7l-2 3	32.68
	mail1-1 pp7l-2 3	33.02
	main-2 1	33.5	34.1267	9.7	10.25	0.000821188	0.000666012	0.000548568	0.000135824	0.000111873
	main-2 1	35.04
	main-2 1	33.84
	main-2 2	35.46	34.97	10.1333	10.6833	0.00060813
	main-2 2	35.24
	main-2 2	34.21
	main-2 3	34.59	35.33	10.23	10.78	0.000568718
	main-2 3	36.17
	main-2 3	35.23
TAF4b	Col 1	32.9	32.5233	7.27333	0	1	1.72505	1	0.682024	0.395364
	Col 1	32.68
	Col 1	31.99
	Col 2	32.12	31.8733	6.40833	-0.865	1.82134
	Col 2	31.85
	Col 2	31.65
	Col 3	31.94	32.0733	6.03833	-1.235	2.35381
	Col 3	32.11
	Col 3	32.17
	mail1-1 1	28.12	28.1867	2.62333	-4.65	25.1067	24.4395	14.1674	5.98676	3.47049
	mail1-1 1	28.29
	mail1-1 1	28.15
	mail1-1 2	27.82	27.83	2.36333	-4.91	30.0647
	mail1-1 2	27.79
	mail1-1 2	27.88
	mail1-1 3	27.98	28.1367	3.09167	-4.18167	18.1471
	mail1-1 3	28.17
	mail1-1 3	28.26
	pp7l-2 1	28.21	28.2033	2.78667	-4.48667	22.4193	19.378	11.2333	2.64355	1.53245
	pp7l-2 1	28.17
	pp7l-2 1	28.23
	pp7l-2 2	28.16	28.1833	3.13333	-4.14	17.6305
	pp7l-2 2	28.08
	pp7l-2 2	28.31
	pp7l-2 3	28.18	28.1267	3.09667	-4.17667	18.0843
	pp7l-2 3	28.14
	pp7l-2 3	28.06
	mail1-1 pp7l-2 1	27.82	27.8867	2.84333	-4.43	21.5557	22.3752	12.9707	0.711587	0.412502
	mail1-1 pp7l-2 1	27.89
	mail1-1 pp7l-2 1	27.95
	mail1-1 pp7l-2 2	28.44	28.05	2.76667	-4.50667	22.7322
	mail1-1 pp7l-2 2	27.92
	mail1-1 pp7l-2 2	27.79
	mail1-1 pp7l-2 3	27.85	27.75	2.76	-4.51333	22.8375
	mail1-1 pp7l-2 3	27.69
	mail1-1 pp7l-2 3	27.71
	main-2 1	27.59	27.5833	3.15667	-4.11667	17.3476	18.0842	10.4833	1.24112	0.719469
	main-2 1	27.58
	main-2 1	27.58
	main-2 2	28	27.99	3.15333	-4.12	17.3878
	main-2 2	27.96
	main-2 2	28.01
	main-2 3	28.13	28.0867	2.98667	-4.28667	19.5171
	main-2 3	28.03
	main-2 3	28.1
At12cys-2	Col 1	35.07	35.2267	9.97667	0	1	1.65543	1	0.883697	0.533816
	Col 1	35.85
	Col 1	34.76
	Col 2	34.36	35.0567	9.59167	-0.385	1.30586
	Col 2	35.18
	Col 2	35.63
	Col 3	34.2	34.6	8.565	-1.41167	2.66044
	Col 3	33.78
	Col 3	35.82
	mail1-1 1	28.89	29.05	3.48667	-6.49	89.8845	69.5222	41.9963	21.1468	12.7742
	mail1-1 1	29.19
	mail1-1 1	29.07
	mail1-1 2	29.15	29.2933	3.82667	-6.15	71.0124
	mail1-1 2	29.46
	mail1-1 2	29.27
	mail1-1 3	29.45	29.4467	4.40167	-5.575	47.6697
	mail1-1 3	29.53
	mail1-1 3	29.36
	pp7l-2 1	29.07	29.15	3.73333	-6.24333	75.7584	62.071	37.4953	12.2581	7.40475
	pp7l-2 1	29.33
	pp7l-2 1	29.05
	pp7l-2 2	29.15	29.16	4.11	-5.86667	58.3502
	pp7l-2 2	29.21
	pp7l-2 2	29.12
	pp7l-2 3	29.3	29.3033	4.27333	-5.70333	52.1044
	pp7l-2 3	29.32
	pp7l-2 3	29.29
	mail1-1 pp7l-2 1	28.16	28.2067	3.16333	-6.81333	112.465	113.91	68.8096	4.16366	2.51515
	mail1-1 pp7l-2 1	28.2
	mail1-1 pp7l-2 1	28.26
	mail1-1 pp7l-2 2	28.31	28.37	3.08667	-6.89	118.603
	mail1-1 pp7l-2 2	28.54
	mail1-1 pp7l-2 2	28.26
	mail1-1 pp7l-2 3	28.32	28.1767	3.18667	-6.79	110.661
	mail1-1 pp7l-2 3	28.16
	mail1-1 pp7l-2 3	28.05
	main-2 1	28.78	28.8333	4.40667	-5.57	47.5048	54.5684	32.9632	14.8865	8.99249
	main-2 1	28.86
	main-2 1	28.86
	main-2 2	28.75	28.65	3.81333	-6.16333	71.6718
	main-2 2	28.53
	main-2 2	28.67
	main-2 3	29.8	29.6	4.5	-5.47667	44.5288
	main-2 3	29.65
	main-2 3	29.35
SHOC1	Col 1	33.95	34.0833	8.83333	0	1	1.15209	1	0.185091	0.160657
	Col 1	34.71
	Col 1	33.59
	Col 2	33.5	34.1633	8.69833	-0.135	1.09809
	Col 2	34.34
	Col 2	34.65
	Col 3	33.99	34.4267	8.39167	-0.441667	1.35817
	Col 3	34.67
	Col 3	34.62
	mail1-1 1	30.77	30.82	5.25667	-3.57667	11.9312	12.9033	11.1999	2.92056	2.53501
	mail1-1 1	30.99
	mail1-1 1	30.7
	mail1-1 2	30.5	30.2833	4.81667	-4.01667	16.1859
	mail1-1 2	30.36
	mail1-1 2	29.99
	mail1-1 3	29.98	30.4733	5.42833	-3.405	10.5927
	mail1-1 3	30.48
	mail1-1 3	30.96
	pp7l-2 1	31.43	31.23	5.81333	-3.02	8.11168	8.75539	7.59958	1.22937	1.06708
	pp7l-2 1	30.93
	pp7l-2 1	31.33
	pp7l-2 2	30.61	30.8867	5.83667	-2.99667	7.98154
	pp7l-2 2	30.93
	pp7l-2 2	31.12
	pp7l-2 3	30.26	30.5167	5.48667	-3.34667	10.173
	pp7l-2 3	30.65
	pp7l-2 3	30.64
	mail1-1 pp7l-2 1	30.46	30.2	5.15667	-3.67667	12.7875	12.4795	10.8321	0.350767	0.304462
	mail1-1 pp7l-2 1	30.04
	mail1-1 pp7l-2 1	30.1
	mail1-1 pp7l-2 2	30.32	30.52	5.23667	-3.59667	12.0977
	mail1-1 pp7l-2 2	30.47
	mail1-1 pp7l-2 2	30.77
	mail1-1 pp7l-2 3	30.14	30.1733	5.18333	-3.65	12.5533
	mail1-1 pp7l-2 3	30.33
	mail1-1 pp7l-2 3	30.05
	main-2 1	30.23	30.4333	6.00667	-2.82667	7.09433	9.5959	8.32914	2.37561	2.062
	main-2 1	30.27
	main-2 1	30.8
	main-2 2	30.19	30.1067	5.27	-3.56333	11.8214
	main-2 2	29.94
	main-2 2	30.19
	main-2 3	30.89	30.63	5.53	-3.30333	9.87194
	main-2 3	30.47
	main-2 3	30.53
UNK1	Col 1	30.04	28.9967	5.20667	0	1	1.37192	1	0.312848	0.228037
	Col 1	28.61
	Col 1	28.34
	Col 2	27.94	27.9	4.38667	-0.82	1.76541
	Col 2	27.77
	Col 2	27.99
	Col 3	28.56	28.5033	4.77333	-0.433333	1.35035
	Col 3	28.49
	Col 3	28.46
	mail1-1 1	21.13	21.1033	-2.79667	-8.00333	256.592	259.419	189.092	4.85816	3.54114
	mail1-1 1	21.05
	mail1-1 1	21.13
	mail1-1 2	21.07	21.0667	-2.85	-8.05667	266.255
	mail1-1 2	21.07
	mail1-1 2	21.06
	mail1-1 3	20.97	21.0067	-2.79	-7.99667	255.409
	mail1-1 3	21.03
	mail1-1 3	21.02
	pp7l-2 1	21.06	20.9667	-2.69	-7.89667	238.305	208.676	152.105	22.7118	16.5547
	pp7l-2 1	20.83
	pp7l-2 1	21.01
	pp7l-2 2	21.56	21.6367	-2.31	-7.51667	183.123
	pp7l-2 2	21.77
	pp7l-2 2	21.58
	pp7l-2 3	21.51	21.41	-2.47	-7.67667	204.601
	pp7l-2 3	21.23
	pp7l-2 3	21.49
	mail1-1 pp7l-2 1	21.61	21.6933	-2.25	-7.45667	175.663	217.347	158.425	48.2897	35.1986
	mail1-1 pp7l-2 1	21.91
	mail1-1 pp7l-2 1	21.56
	mail1-1 pp7l-2 2	21.68	21.6067	-2.37333	-7.58	191.341
	mail1-1 pp7l-2 2	21.25
	mail1-1 pp7l-2 2	21.89
	mail1-1 pp7l-2 3	21.09	20.975	-2.94833	-8.155	285.036
	mail1-1 pp7l-2 3	21.07
	mail1-1 pp7l-2 3	20.88
	main-2 1	20.76	20.8367	-2.4	-7.60667	194.91	214.479	156.335	28.9513	21.1028
	main-2 1	20.83
	main-2 1	20.92
	main-2 2	21.61	21.4433	-2.38667	-7.59333	193.117
	main-2 2	21.21
	main-2 2	21.51
	main-2 3	21.06	21.1533	-2.79	-7.99667	255.409
	main-2 3	21.36
	main-2 3	21.04

## Sheet: S1G fig
Experiment: exp3994 Selected Filter: SYBR Green I / HRM Dye (465-510)
Include	Color	Pos	Name	Cp	RHIP1	Status
True	255	B2	Sample 1	25.12	25.04	col rep1
True	255	B3	Sample 2	24.96
True	255	B4	Sample 3	26.51
True	255	B8	Sample 7	24.51	24.33	col rep2
True	255	B9	Sample 8	24.32
True	255	B10	Sample 9	24.16
True	255	B14	Sample 13	23.75	23.51	main-2 rep1
True	255	B15	Sample 14	23.56
True	255	B16	Sample 15	23.22
True	255	B17	Sample 16	22.27	21.92	main-2 rep2
True	255	B18	Sample 17	21.77
True	255	B19	Sample 18	21.72
True	65280	C2	Sample 22		25.085	ddc16 rep1
True	255	C3	Sample 23	24.53
True	255	C4	Sample 24	25.64
True	255	C5	Sample 25	25.2	25.6433	ddc16 rep2
True	255	C6	Sample 26	25.8
True	255	C7	Sample 27	25.93
True	255	C11	Sample 31	24.24	23.84	F1 ddc16xcol rep1
True	255	C12	Sample 32	23.65
True	255	C13	Sample 33	23.63
True	255	C14	Sample 33	23.23	23.0733	F1 ddc16xcol rep2
True	255	C15	Sample 34	23.05
True	255	C16	Sample 35	22.94
True	255	C17	Sample 36	25.99	25.9133	F1 ddc16xmain-2 rep1
True	255	C18	Sample 37	25.77
True	255	C19	Sample 38	25.98
True	255	C20	Sample 39	26.99	26.8733	F1 ddc-16xmain-2 rep2
True	255	C21	Sample 40	26.78
True	255	C22	Sample 41	26.85
Include	Color	Pos	Name	Cp	ATMU1	Concentration	Status						RHIP1	ATMU1	∂	∂∂		mean	normalized mean	std dev	normalized std dev
True	True	255	Sample 1	30.57	29.81	col rep1						col rep1	25.04	29.81	4.77	0	1	0.658586	1	0.341414	0.518406
True	True	255	Sample 2	29.78
True	True	255	Sample 3	29.08
True	True	255	Sample 7	31.91	30.7567	col rep2						col rep2	24.33	30.7567	6.42667	1.65667	0.317171
True	True	255	Sample 8	30.68
True	True	255	Sample 9	29.68
True	True	255	Sample 13	26.84	26.7533	main-2 rep1						main-2 rep1	23.51	26.7533	3.24333	-1.52667	2.88119	3.21009	4.87421	0.328893	0.499393
True	True	255	Sample 14	26.84
True	True	255	Sample 15	26.58
True	True	255	Sample 16	24.59	24.8667	main-2 rep2						main-2 rep2	21.92	24.8667	2.94667	-1.82333	3.53898
True	True	255	Sample 17	24.9
True	True	255	Sample 18	25.11
True	True	255	Sample 22	23.24	22.5733	ddc16 rep1						ddc16 rep1	25.085	22.5733	-2.51167	-7.28167	155.597	192.097	291.681	36.5005	55.4226
True	True	255	Sample 23	22.57
True	True	255	Sample 24	21.91
True	True	255	Sample 25	22.44	22.5767	ddc16 rep2						ddc16 rep2	25.6433	22.5767	-3.06667	-7.83667	228.598
True	True	255	Sample 26	22.7
True	True	255	Sample 27	22.59
True	True	255	Sample 31	30.66	30.78	F1 ddc16xcol rep1						F1 ddc16xcol rep1	23.84	30.78	6.94	2.17	0.222211	0.244152	0.370721	0.0219409	0.0333152
True	True	255	Sample 32	30.78
True	True	255	Sample 33	30.9
True	True	255	Sample 33	29.56	29.7533	F1 ddc16xcol rep2						F1 ddc16xcol rep2	23.0733	29.7533	6.68	1.91	0.266093
True	True	255	Sample 34	30
True	True	255	Sample 35	29.7
True	True	255	Sample 36	27.91	27.8333	F1 ddc16xmain-2 rep1						F1 ddc16xmain-2 rep1	25.9133	27.8333	1.92	-2.85	7.21	8.52958	12.9514	1.31958	2.00365
True	True	255	Sample 37	27.87
True	True	255	Sample 38	27.72
True	True	255	Sample 39	27.91	28.3433	F1 ddc-16xmain-2 rep2						F1 ddc-16xmain-2 rep2	26.8733	28.3433	1.47	-3.3	9.84916
True	True	255	Sample 40	28.84
True	True	255	Sample 41	28.28
Include	Color	Pos	Name	Cp	ATCOPIA28	Concentration	Status						RHIP1	ATCOPIA28	∂	∂∂		mean	normalized mean	std dev	normalized std dev
True	True	255	Sample 1	35.82	35.6567	col rep1						col rep1	25.04	35.6567	10.6167	0	1	2.5	1	1.5	0.6
True	True	255	Sample 2	36.4
True	True	255	Sample 3	34.75
True	True	255	Sample 7	33.08	32.9467	col rep2						col rep2	24.33	32.9467	8.61667	-2	4
True	True	255	Sample 8	32.29
True	True	255	Sample 9	33.47
True	True	255	Sample 13	26.94	26.8867	main-2 rep1						main-2 rep1	23.51	26.8867	3.37667	-7.24	151.167	131.816	52.7264	19.351	7.7404
True	True	255	Sample 14	27.02
True	True	255	Sample 15	26.7
True	True	255	Sample 16	25.72	25.7233	main-2 rep2						main-2 rep2	21.92	25.7233	3.80333	-6.81333	112.465
True	True	255	Sample 17	25.65
True	True	255	Sample 18	25.8
True	True	255	Sample 22	20.31	20.2033	ddc16 rep1						ddc16 rep1	25.085	20.2033	-4.88167	-15.4983	46287.4	60524.3	24209.7	14236.8	5694.73
True	True	255	Sample 23	20.25
True	True	255	Sample 24	20.05
True	True	255	Sample 25	19.77	20.07	ddc16 rep2						ddc16 rep2	25.6433	20.07	-5.57333	-16.19	74761.1
True	True	255	Sample 26	20.45
True	True	255	Sample 27	19.99
True	True	255	Sample 31	33.7	33.23	F1 ddc16xcol rep1						F1 ddc16xcol rep1	23.84	33.23	9.39	-1.22667	2.34026	3.85217	1.54087	1.51192	0.604767
True	True	255	Sample 32	32.65
True	True	255	Sample 33	33.34
True	True	255	Sample 33	31.6	31.2667	F1 ddc16xcol rep2						F1 ddc16xcol rep2	23.0733	31.2667	8.19333	-2.42333	5.36409
True	True	255	Sample 34	31.02
True	True	255	Sample 35	31.18
True	True	255	Sample 36	28.7	28.7933	F1 ddc16xmain-2 rep1						F1 ddc16xmain-2 rep1	25.9133	28.7933	2.88	-7.73667	213.289	241.943	96.7772	28.6537	11.4615
True	True	255	Sample 37	28.89
True	True	255	Sample 38	28.79
True	True	255	Sample 39	28.76	29.41	F1 ddc-16xmain-2 rep2						F1 ddc-16xmain-2 rep2	26.8733	29.41	2.53667	-8.08	270.597
True	True	255	Sample 40	29.78
True	True	255	Sample 41	29.69
Include	Color	Pos	Name	Cp	ROMANIAT5	Concentration	Status						RHIP1	ROMANIAT5	∂	∂∂		mean	normalized mean	std dev	normalized std dev
True	65280	True	Sample 1		37.94	col rep1						col rep1	25.04	37.94	12.9	0	1	1.54972	1	0.549717	0.354721
True	255	True	Sample 2	37.94
True	65280	True	Sample 3
True	255	True	Sample 7	36.61	36.16	col rep2						col rep2	24.33	36.16	11.83	-1.07	2.09943
True	65280	True	Sample 8
True	255	True	Sample 9	35.71
True	255	True	Sample 13	31.05	30.7333	main-2 rep1						main-2 rep1	23.51	30.7333	7.22333	-5.67667	51.1502	48.2025	31.1041	2.94766	1.90206
True	255	True	Sample 14	30.64
True	255	True	Sample 15	30.51
True	255	True	Sample 16	29.6	29.32	main-2 rep2						main-2 rep2	21.92	29.32	7.4	-5.5	45.2548
True	255	True	Sample 17	29.25
True	255	True	Sample 18	29.11
True	255	True	Sample 22	24.79	23.4167	ddc16 rep1						ddc16 rep1	25.085	23.4167	-1.66833	-14.5683	24294.4	39072.3	25212.6	14778	9535.92
True	255	True	Sample 23	22.57
True	255	True	Sample 24	22.89
True	255	True	Sample 25	22.86	22.8267	ddc16 rep2						ddc16 rep2	25.6433	22.8267	-2.81667	-15.7167	53850.3
True	255	True	Sample 26	22.81
True	255	True	Sample 27	22.81
True	255	True	Sample 31	36.67	37.6067	F1 ddc16xcol rep1						F1 ddc16xcol rep1	23.84	37.6067	13.7667	0.866667	0.548412	0.569454	0.367457	0.0210419	0.0135779
True	255	True	Sample 32	40
True	255	True	Sample 33	36.15
True	255	True	Sample 33	36.11	36.7333	F1 ddc16xcol rep2						F1 ddc16xcol rep2	23.0733	36.7333	13.66	0.76	0.590496
True	255	True	Sample 34	40
True	255	True	Sample 35	34.09
True	255	True	Sample 36	33.85	32.9267	F1 ddc16xmain-2 rep1						F1 ddc16xmain-2 rep1	25.9133	32.9267	7.01333	-5.88667	59.1648	98.9729	63.8652	39.8081	25.6874
True	255	True	Sample 37	32.83
True	255	True	Sample 38	32.1
True	255	True	Sample 39	32.54	32.6567	F1 ddc-16xmain-2 rep2						F1 ddc-16xmain-2 rep2	26.8733	32.6567	5.78333	-7.11667	138.781
True	255	True	Sample 40	32.7
True	255	True	Sample 41	32.73

## Sheet: S2B fig
Experiment: exp3757 Selected Filter: SYBR Green I / HRM Dye (465-510)
Include	Color	Pos	Name	Cp	RHIP1
TRUE	255	A1	Sample 1	25.43	25.6167	WT
TRUE	255	A2	Sample 2	25.8
TRUE	255	A3	Sample 3	25.62
TRUE	255	A4	Sample 4	25.62	25.3333	WT
TRUE	255	A5	Sample 5	25.14
TRUE	255	A6	Sample 6	25.24
TRUE	255	A13	Sample 13	26.94	26.6433	ddc
TRUE	255	A14	Sample 14	26.53
TRUE	255	A15	Sample 15	26.46
TRUE	255	A16	Sample 16	25.29	25.2033	ddc
TRUE	255	A17	Sample 17	25.21
TRUE	255	A18	Sample 18	25.11
TRUE	255	A19	Sample 19	27.01	26.96	main-3
TRUE	255	A20	Sample 20	27.03
TRUE	255	A21	Sample 21	26.84
TRUE	255	A22	Sample 22	27.12	27.1	main-3
TRUE	255	A23	Sample 23	27.07
TRUE	255	A24	Sample 24	27.11
TRUE	255	B1	Sample 25	26.19	26.04	main-3
TRUE	255	B2	Sample 26	26.16
TRUE	255	B3	Sample 27	25.77
TRUE	255	B4	Sample 28	25.51	25.4233	ddc main-3
TRUE	255	B5	Sample 29	25.52
TRUE	255	B6	Sample 30	25.24
TRUE	255	B10	Sample 34	25.76	25.6667	ddc main-3
TRUE	255	B11	Sample 35	25.63
TRUE	255	B12	Sample 36	25.61
Include	Color	Pos	Name	Cp	ATCOPIA28								RHIP1	ATCOPIA28	∂	∂∂		mean	normalized mean	std dev	normalized std dev
TRUE	255	E1	Sample 97	30.25	30.26	WT						WT	25.6167	30.26	4.64333	0	1	0.815725	1	0.208104	0.255116
TRUE	255	E2	Sample 98	30.57
TRUE	255	E3	Sample 99	29.96
TRUE	255	E4	Sample 100	31.2	30.9067	WT						WT	25.3333	30.9067	5.57333	0.93	0.524858
TRUE	255	E5	Sample 101	30.77
TRUE	255	E6	Sample 102	30.75
TRUE	255	E13	Sample 109	28.98	29	ddc						ddc	26.6433	29	2.35667	-2.28667	4.87927	3.85134	4.72137	0.948693	1.16301
TRUE	255	E14	Sample 110	29.08
TRUE	255	E15	Sample 111	28.94
TRUE	255	E16	Sample 112	28.3	28.4733	ddc						ddc	25.2033	28.4733	3.27	-1.37333	2.59068
TRUE	255	E17	Sample 113	28.59
TRUE	255	E18	Sample 114	28.53
TRUE	255	E19	Sample 115	29.58	29.6833	main-3						main-3	26.96	29.6833	2.72333	-1.92	3.78423	3.33074	4.08317	1.15176	1.41194
TRUE	255	E20	Sample 116	29.79
TRUE	255	E21	Sample 117	29.68
TRUE	255	E22	Sample 118	29.58	29.5867	main-3						main-3	27.1	29.5867	2.48667	-2.15667	4.45883
TRUE	255	E23	Sample 119	29.55
TRUE	255	E24	Sample 120	29.63
TRUE	255	F1	Sample 121	29.8	29.8767	main-3						main-3	26.04	29.8767	3.83667	-0.806667	1.74917
TRUE	255	F2	Sample 122	29.78
TRUE	255	F3	Sample 123	30.05
TRUE	255	F4	Sample 124	21.6	21.62	ddc main-3						ddc main-3	25.4233	21.62	-3.80333	-8.44667	348.899	481.477	590.245	137.477	168.533
TRUE	255	F5	Sample 125	21.66
TRUE	255	F6	Sample 126	21.6
TRUE	255	F10	Sample 130	21.78	21.58	ddc main-3						ddc main-3	25.6667	21.58	-4.08667	-8.73	424.612
TRUE	255	F11	Sample 131	21.5
TRUE	255	F12	Sample 132	21.46
Include	Color	Pos	Name	Cp	HELITRONY1D								RHIP1	HELITRONY1D	∂	∂∂		mean	normalized mean	std dev	normalized std dev
TRUE	255	I1	Sample 193	36.47	35.7133	WT						WT	25.6167	35.7133	10.0967	0	1	0.730579	1	0.269421	0.368777
TRUE	255	I2	Sample 194	35.13
TRUE	255	I3	Sample 195	35.54
TRUE	255	I4	Sample 196	36.05	36.5467	WT						WT	25.3333	36.5467	11.2133	1.11667	0.461158
TRUE	255	I5	Sample 197	36.93
TRUE	255	I6	Sample 198	36.66
TRUE	255	I13	Sample 205	24.75	25.04	ddc						ddc	26.6433	25.04	-1.60333	-11.7	3326.99	2394.29	3277.25	932.693	1276.65
TRUE	255	I14	Sample 206	25.02
TRUE	255	I15	Sample 207	25.35
TRUE	255	I16	Sample 208	24.85	24.7867	ddc						ddc	25.2033	24.7867	-0.416667	-10.5133	1461.6
TRUE	255	I17	Sample 209	24.77
TRUE	255	I18	Sample 210	24.74
TRUE	255	I19	Sample 211	31.95	32.1267	main-3						main-3	26.96	32.1267	5.16667	-4.93	30.4844	34.8943	47.7625	7.82317	10.7082
TRUE	255	I20	Sample 212	31.92
TRUE	255	I21	Sample 213	32.51
TRUE	255	I22	Sample 214	31.88	32.3733	main-3						main-3	27.1	32.3733	5.27333	-4.82333	28.3118
TRUE	255	I23	Sample 215	31.68
TRUE	255	I24	Sample 216	33.56
TRUE	255	J1	Sample 217	30.91	30.6167	main-3						main-3	26.04	30.6167	4.57667	-5.52	45.8866
TRUE	255	J2	Sample 218	30.6
TRUE	255	J3	Sample 219	30.34
TRUE	255	J4	Sample 220	25.11	25.2033	ddc main-3						ddc main-3	25.4233	25.2033	-0.22	-10.3167	1275.34	1091.71	1494.3	183.633	251.353
TRUE	255	J5	Sample 221	24.82
TRUE	255	J6	Sample 222	25.68
TRUE	255	J10	Sample 226	25.58	25.9367	ddc main-3						ddc main-3	25.6667	25.9367	0.27	-9.82667	908.074
TRUE	255	J11	Sample 227	25.64
TRUE	255	J12	Sample 228	26.59

## Sheet: S2D fig
Experiment: exp3559 Selected Filter: SYBR Green I / HRM Dye (465-510)
Include	Color	Pos	Name	Cp	RHIP1
TRUE	255	A1	Sample 1	25.49	25.28	WT
TRUE	255	A2	Sample 2	25.17
TRUE	255	A3	Sample 3	25.18
TRUE	255	A4	Sample 4	24.76	24.8033	WT
TRUE	255	A5	Sample 5	24.85
TRUE	255	A6	Sample 6	24.8
TRUE	255	A7	Sample 7	24.99	24.9433	WT
TRUE	255	A8	Sample 8	24.95
TRUE	255	A9	Sample 9	24.89
TRUE	255	A10	Sample 10	24.2	24.26	ddc
TRUE	255	A11	Sample 11	32.07
TRUE	255	A12	Sample 12	24.32
TRUE	255	A13	Sample 13	25.06	25.115	ddc
TRUE	255	A14	Sample 14	40
TRUE	255	A15	Sample 15	25.17
TRUE	255	A16	Sample 16	23.75	23.7833	ddc
TRUE	255	A17	Sample 17	23.78
TRUE	255	A18	Sample 18	23.82
TRUE	255	A19	Sample 19	24.59	24.35	main-3
TRUE	255	A20	Sample 20	24.17
TRUE	255	A21	Sample 21	24.29
TRUE	255	A22	Sample 22	24.54	24.43	main-3
TRUE	255	A23	Sample 23	24.42
TRUE	255	A24	Sample 24	24.33
TRUE	255	B1	Sample 25	24.65	24.5767	main-3
TRUE	255	B2	Sample 26	24.66
TRUE	255	B3	Sample 27	24.42
TRUE	255	B4	Sample 28	24.18	24.06	ddc main-3
TRUE	255	B5	Sample 29	24
TRUE	255	B6	Sample 30	24
TRUE	255	B7	Sample 31	23.42	23.3533	ddc main-3
TRUE	255	B8	Sample 32	23.13
TRUE	255	B9	Sample 33	23.51
TRUE	255	B10	Sample 34	24.13	24.06	ddc main-3
TRUE	255	B11	Sample 35	23.95
TRUE	255	B12	Sample 36	24.1
Include	Color	Pos	Name	Cp	LINE 1								RHIP1	LINE 1	∂	∂∂		mean	normalized mean	std dev	normalized std dev
TRUE	255	E1	Sample 97	35.8	35.2067	WT						WT	25.28	35.2067	9.92667	0	1	1.0188	1	0.304846	0.299221
TRUE	255	E2	Sample 98	35.82
TRUE	255	E3	Sample 99	34
TRUE	255	E4	Sample 100	34.17	34.2433	WT						WT	24.8033	34.2433	9.44	-0.486667	1.4012
TRUE	255	E5	Sample 101	34.32
TRUE	255	E6	Sample 102	34.24
TRUE	255	E7	Sample 103	34.77	35.48	WT						WT	24.9433	35.48	10.5367	0.61	0.655197
TRUE	255	E8	Sample 104	35.73
TRUE	255	E9	Sample 105	35.94
TRUE	255	E10	Sample 106	30.75	30.8633	ddc						ddc	24.26	30.8633	6.60333	-3.32333	10.0097	11.3104	11.1016	2.47443	2.42877
TRUE	255	E11	Sample 107	31.34
TRUE	255	E12	Sample 108	30.5
TRUE	255	E13	Sample 109	31.31	31.1567	ddc						ddc	25.115	31.1567	6.04167	-3.885	14.7741
TRUE	255	E14	Sample 110	31.03
TRUE	255	E15	Sample 111	31.13
TRUE	255	E16	Sample 112	30.95	30.5167	ddc						ddc	23.7833	30.5167	6.73333	-3.19333	9.14722
TRUE	255	E17	Sample 113	30.29
TRUE	255	E18	Sample 114	30.31
TRUE	255	E19	Sample 115	33.23	33.5	main-3						main-3	24.35	33.5	9.15	-0.776667	1.71317	1.14164	1.12057	0.4401	0.431978
TRUE	255	E20	Sample 116	33.48
TRUE	255	E21	Sample 117	33.79
TRUE	65280	E22	Sample 118		34.995	main-3						main-3	24.43	34.995	10.565	0.638333	0.642455
TRUE	255	E23	Sample 119	35.79
TRUE	255	E24	Sample 120	34.2
TRUE	255	F1	Sample 121	34.21	34.4067	main-3						main-3	24.5767	34.4067	9.83	-0.0966667	1.0693
TRUE	255	F2	Sample 122	34.29
TRUE	255	F3	Sample 123	34.72
TRUE	255	F4	Sample 124	24.57	24.5767	ddc main-3						ddc main-3	24.06	24.5767	0.516667	-9.41	680.287	710.041	696.939	21.1393	20.7492
TRUE	255	F5	Sample 125	24.54
TRUE	255	F6	Sample 126	24.62
TRUE	255	F7	Sample 127	23.73	23.7833	ddc main-3						ddc main-3	23.3533	23.7833	0.43	-9.49667	722.406
TRUE	255	F8	Sample 128	23.83
TRUE	255	F9	Sample 129	23.79
TRUE	255	F10	Sample 130	24.49	24.48	ddc main-3						ddc main-3	24.06	24.48	0.42	-9.50667	727.431
TRUE	255	F11	Sample 131	24.44
TRUE	255	F12	Sample 132	24.51
Include	Color	Pos	Name	Cp	LINE 2								RHIP1	LINE 2	∂	∂∂		mean	normalized mean	std dev	normalized std dev
TRUE	255	G1	Sample 145	35.46	35.6467	WT						WT	25.28	35.6467	10.3667	0	1	0.883017	1	0.237221	0.268648
TRUE	255	G2	Sample 146	35.28
TRUE	255	G3	Sample 147	36.2
TRUE	255	G4	Sample 148	34.29	35.0367	WT						WT	24.8033	35.0367	10.2333	-0.133333	1.09682
TRUE	255	G5	Sample 149	35.33
TRUE	255	G6	Sample 150	35.49
TRUE	255	G7	Sample 151	36.18	36.1667	WT						WT	24.9433	36.1667	11.2233	0.856667	0.552227
TRUE	255	G8	Sample 152	36.12
TRUE	255	G9	Sample 153	36.2
TRUE	255	G10	Sample 154	25.05	25.0433	ddc						ddc	24.26	25.0433	0.783333	-9.58333	767.133	745.891	844.707	41.2697	46.7371
TRUE	255	G11	Sample 155	25.03
TRUE	255	G12	Sample 156	25.05
TRUE	255	G13	Sample 157	25.85	25.87	ddc						ddc	25.115	25.87	0.755	-9.61167	782.348
TRUE	255	G14	Sample 158	25.85
TRUE	255	G15	Sample 159	25.91
TRUE	255	G16	Sample 160	24.77	24.7233	ddc						ddc	23.7833	24.7233	0.94	-9.42667	688.192
TRUE	255	G17	Sample 161	24.69
TRUE	255	G18	Sample 162	24.71
TRUE	255	G19	Sample 163	36.56	35.6133	main-3						main-3	24.35	35.6133	11.2633	0.896667	0.537126	0.513645	0.581693	0.0340899	0.0386062
TRUE	255	G20	Sample 164	35.96
TRUE	255	G21	Sample 165	34.32
TRUE	255	G22	Sample 166	36.21	35.9	main-3						main-3	24.43	35.9	11.47	1.10333	0.46544
TRUE	255	G23	Sample 167	35.26
TRUE	255	G24	Sample 168	36.23
TRUE	255	H1	Sample 169	36.17	35.8367	main-3						main-3	24.5767	35.8367	11.26	0.893333	0.538369
TRUE	255	H2	Sample 170	36.11
TRUE	255	H3	Sample 171	35.23
TRUE	255	H4	Sample 172	23.24	23.2267	ddc main-3						ddc main-3	24.06	23.2267	-0.833333	-11.2	2352.53	2505.39	2837.3	164.536	186.334
TRUE	255	H5	Sample 173	23.19
TRUE	255	H6	Sample 174	23.25
TRUE	255	H7	Sample 175	22.49	22.4733	ddc main-3						ddc main-3	23.3533	22.4733	-0.88	-11.2467	2429.88
TRUE	255	H8	Sample 176	22.47
TRUE	255	H9	Sample 177	22.46
TRUE	255	H10	Sample 178	23.01	23.01	ddc main-3						ddc main-3	24.06	23.01	-1.05	-11.4167	2733.75
TRUE	255	H11	Sample 179	23.02
TRUE	255	H12	Sample 180	23
Experiment: exp3560 Selected Filter: SYBR Green I / HRM Dye (465-510)
Include	Color	Pos	Name	Cp	ATIS112A								RHIP1	ATIS112A	∂	∂∂		mean	normalized mean	std dev	normalized std dev
TRUE	255	A1	Sample 1	29.31	29.1133	WT						WT	25.28	29.1133	3.83333	0	1	1.20213	1	0.290746	0.24186
TRUE	255	A2	Sample 2	29.15
TRUE	255	A3	Sample 3	28.88
TRUE	255	A4	Sample 4	28.76	28.6467	WT						WT	24.8033	28.6467	3.84333	0.01	0.993092
TRUE	255	A5	Sample 5	28.58
TRUE	255	A6	Sample 6	28.6
TRUE	255	A7	Sample 7	28.13	28.0867	WT						WT	24.9433	28.0867	3.14333	-0.69	1.61328
TRUE	255	A8	Sample 8	28.15
TRUE	255	A9	Sample 9	27.98
TRUE	255	A10	Sample 10	22.08	22.0533	ddc						ddc	24.26	22.0533	-2.20667	-6.04	65.7993	58.6562	48.7938	5.34213	4.4439
TRUE	255	A11	Sample 11	22.08
TRUE	255	A12	Sample 12	22
TRUE	255	A13	Sample 13	23.12	23.11	ddc						ddc	25.115	23.11	-2.005	-5.83833	57.2155
TRUE	255	A14	Sample 14	23.09
TRUE	255	A15	Sample 15	23.12
TRUE	255	A16	Sample 16	21.82	21.89	ddc						ddc	23.7833	21.89	-1.89333	-5.72667	52.954
TRUE	255	A17	Sample 17	21.94
TRUE	255	A18	Sample 18	21.91
TRUE	255	A19	Sample 19	23.11	23.1133	main-3						main-3	24.35	23.1133	-1.23667	-5.07	33.5909	37.1198	30.8785	2.78925	2.32027
TRUE	255	A20	Sample 20	23.06
TRUE	255	A21	Sample 21	23.17
TRUE	255	A22	Sample 22	22.96	22.9267	main-3						main-3	24.43	22.9267	-1.50333	-5.33667	40.4107
TRUE	255	A23	Sample 23	22.92
TRUE	255	A24	Sample 24	22.9
TRUE	255	B1	Sample 25	23.21	23.1867	main-3						main-3	24.5767	23.1867	-1.39	-5.22333	37.3577
TRUE	255	B2	Sample 26	23.1
TRUE	255	B3	Sample 27	23.25
TRUE	255	B4	Sample 28	19.95	19.9367	ddc main-3						ddc main-3	24.06	19.9367	-4.12333	-7.95667	248.425	263.004	218.782	10.462	8.70294
TRUE	255	B5	Sample 29	20.02
TRUE	255	B6	Sample 30	19.84
TRUE	255	B7	Sample 31	19.12	19.0967	ddc main-3						ddc main-3	23.3533	19.0967	-4.25667	-8.09	272.479
TRUE	255	B8	Sample 32	19.08
TRUE	255	B9	Sample 33	19.09
TRUE	255	B10	Sample 34	19.8	19.8267	ddc main-3						ddc main-3	24.06	19.8267	-4.23333	-8.06667	268.107
TRUE	255	B11	Sample 35	19.85
TRUE	255	B12	Sample 36	19.83
Include	Color	Pos	Name	Cp	ATENSPM6								RHIP1	ATENSPM6	∂	∂∂		mean	normalized mean	std dev	normalized std dev
TRUE	255	E1	Sample 97	32.06	32.7133	WT						WT	25.28	32.7133	7.43333	0	1	1.31272	1	0.380886	0.290151
TRUE	255	E2	Sample 98	33.49
TRUE	255	E3	Sample 99	32.59
TRUE	255	E4	Sample 100	31.7	32.1133	WT						WT	24.8033	32.1133	7.31	-0.123333	1.08925
TRUE	255	E5	Sample 101	31.83
TRUE	255	E6	Sample 102	32.81
TRUE	255	E7	Sample 103	31.66	31.49	WT						WT	24.9433	31.49	6.54667	-0.886667	1.8489
TRUE	255	E8	Sample 104	31.58
TRUE	255	E9	Sample 105	31.23
TRUE	255	E10	Sample 106	24.19	24.2167	ddc						ddc	24.26	24.2167	-0.0433333	-7.47667	178.115	165.505	126.078	15.72	11.9752
TRUE	255	E11	Sample 107	24.23
TRUE	255	E12	Sample 108	24.23
TRUE	255	E13	Sample 109	25.12	25.0967	ddc						ddc	25.115	25.0967	-0.0183333	-7.45167	175.055
TRUE	255	E14	Sample 110	25.11
TRUE	255	E15	Sample 111	25.06
TRUE	255	E16	Sample 112	24.06	24.0533	ddc						ddc	23.7833	24.0533	0.27	-7.16333	143.344
TRUE	255	E17	Sample 113	24
TRUE	255	E18	Sample 114	24.1
TRUE	255	E19	Sample 115	23.44	23.4233	main-3						main-3	24.35	23.4233	-0.926667	-8.36	328.557	346.188	263.719	12.5791	9.58247
TRUE	255	E20	Sample 116	23.49
TRUE	255	E21	Sample 117	23.34
TRUE	255	E22	Sample 118	23.3	23.4	main-3						main-3	24.43	23.4	-1.03	-8.46333	352.953
TRUE	255	E23	Sample 119	23.45
TRUE	255	E24	Sample 120	23.45
TRUE	255	F1	Sample 121	23.54	23.53	main-3						main-3	24.5767	23.53	-1.04667	-8.48	357.054
TRUE	255	F2	Sample 122	23.51
TRUE	255	F3	Sample 123	23.54
TRUE	255	F4	Sample 124	21.78	21.7533	ddc main-3						ddc main-3	24.06	21.7533	-2.30667	-9.74	855.13	860.568	655.563	50.5469	38.5056
TRUE	255	F5	Sample 125	21.73
TRUE	255	F6	Sample 126	21.75
TRUE	255	F7	Sample 127	21.17	21.14	ddc main-3						ddc main-3	23.3533	21.14	-2.21333	-9.64667	801.56
TRUE	255	F8	Sample 128	21.13
TRUE	255	F9	Sample 129	21.12
TRUE	255	F10	Sample 130	21.64	21.64	ddc main-3						ddc main-3	24.06	21.64	-2.42	-9.85333	925.015
TRUE	255	F11	Sample 131	21.66
TRUE	255	F12	Sample 132	21.62
Include	Color	Pos	Name	Cp	RHIP1
TRUE	255	A1	Sample 1	24.45	24.4733	WT
TRUE	255	A2	Sample 2	24.53
TRUE	255	A3	Sample 3	24.44
TRUE	255	A4	Sample 4	24.55	24.59	WT
TRUE	255	A5	Sample 5	24.66
TRUE	255	A6	Sample 6	24.56
TRUE	255	A7	Sample 7	24.99	24.9667	WT
TRUE	255	A8	Sample 8	24.94
TRUE	255	A9	Sample 9	24.97
TRUE	255	A10	Sample 10	24.21	24.17	ddc
TRUE	255	A11	Sample 11	24.19
TRUE	255	A12	Sample 12	24.11
TRUE	255	A13	Sample 13	25.75	25.4733	ddc
TRUE	255	A14	Sample 14	25.32
TRUE	255	A15	Sample 15	25.35
TRUE	255	A16	Sample 16	24.13	24.15	ddc
TRUE	255	A17	Sample 17	24.19
TRUE	255	A18	Sample 18	24.13
TRUE	255	A19	Sample 19	24.66	24.67	main-3
TRUE	255	A20	Sample 20	24.68
TRUE	255	A21	Sample 21	24.67
TRUE	255	A22	Sample 22	24.56	24.5033	main-3
TRUE	255	A23	Sample 23	24.47
TRUE	255	A24	Sample 24	24.48
TRUE	255	B1	Sample 25	24.89	24.8533	main-3
TRUE	255	B2	Sample 26	24.85
TRUE	255	B3	Sample 27	24.82
TRUE	255	B4	Sample 28	24.54	24.5233	ddc main-3
TRUE	255	B5	Sample 29	24.52
TRUE	255	B6	Sample 30	24.51
TRUE	255	B7	Sample 31	23.81	23.7967	ddc main-3
TRUE	255	B8	Sample 32	23.79
TRUE	255	B9	Sample 33	23.79
TRUE	255	B10	Sample 34	24.26	24.2467	ddc main-3
TRUE	255	B11	Sample 35	24.24
TRUE	255	B12	Sample 36	24.24
Include	Color	Pos	Name	Cp	ATMU1								RHIP1	ATMU1	∂	∂∂		mean	normalized mean	std dev	normalized std dev
TRUE	255	E1	Sample 97	29.06	29.0833	WT						WT	24.4733	29.0833	4.61	0	1	0.891895	1	0.123761	0.138762
TRUE	255	E2	Sample 98	29.1
TRUE	255	E3	Sample 99	29.09
TRUE	255	E4	Sample 100	29.14	29.2633	WT						WT	24.59	29.2633	4.67333	0.0633333	0.95705
TRUE	255	E5	Sample 101	29.46
TRUE	255	E6	Sample 102	29.19
TRUE	255	E7	Sample 103	29.99	30.0533	WT						WT	24.9667	30.0533	5.08667	0.476667	0.718636
TRUE	255	E8	Sample 104	30.07
TRUE	255	E9	Sample 105	30.1
TRUE	255	E10	Sample 106	25.86	25.9167	ddc						ddc	24.17	25.9167	1.74667	-2.86333	7.27695	7.70151	8.63499	0.496246	0.556394
TRUE	255	E11	Sample 107	25.93
TRUE	255	E12	Sample 108	25.96
TRUE	255	E13	Sample 109	26.94	27.0133	ddc						ddc	25.4733	27.0133	1.54	-3.07	8.39773
TRUE	255	E14	Sample 110	27.04
TRUE	255	E15	Sample 111	27.06
TRUE	255	E16	Sample 112	25.84	25.8667	ddc						ddc	24.15	25.8667	1.71667	-2.89333	7.42985
TRUE	255	E17	Sample 113	25.88
TRUE	255	E18	Sample 114	25.88
TRUE	255	E19	Sample 115	23.13	23.2033	main-3						main-3	24.67	23.2033	-1.46667	-6.07667	67.493	65.5273	73.4697	4.81994	5.40415
TRUE	255	E20	Sample 116	23.25
TRUE	255	E21	Sample 117	23.23
TRUE	65280	E22	Sample 118	23.25	23.2333	main-3						main-3	24.5033	23.2333	-1.27	-5.88	58.892
TRUE	255	E23	Sample 119	23.22
TRUE	255	E24	Sample 120	23.23
TRUE	255	F1	Sample 121	23.44	23.33	main-3						main-3	24.8533	23.33	-1.52333	-6.13333	70.1968
TRUE	255	F2	Sample 122	23.34
TRUE	255	F3	Sample 123	23.21
TRUE	255	F4	Sample 124	20.9	20.8767	ddc main-3						ddc main-3	24.5233	20.8767	-3.64667	-8.25667	305.847	302.064	338.677	10.806	12.1158
TRUE	255	F5	Sample 125	20.96
TRUE	255	F6	Sample 126	20.77
TRUE	255	F7	Sample 127	20.15	20.1167	ddc main-3						ddc main-3	23.7967	20.1167	-3.68	-8.29	312.996
TRUE	255	F8	Sample 128	20.2
TRUE	255	F9	Sample 129	20
TRUE	255	F10	Sample 130	20.75	20.69	ddc main-3						ddc main-3	24.2467	20.69	-3.55667	-8.16667	287.35
TRUE	255	F11	Sample 131	20.7
TRUE	255	F12	Sample 132	20.62

## Sheet: S2G fig
Experiment: exp3958 Selected Filter: SYBR Green I / HRM Dye (465-510)
Include	Color	Pos	Name	Cp	RHIP1	Status
True	255	B2	Sample 1	23.28	23.16	1	WT
True	255	B3	Sample 2	23.21
True	255	B4	Sample 3	22.99
True	255	B5	Sample 4	22.84	22.6767	2
True	255	B6	Sample 5	22.74
True	255	B7	Sample 6	22.45
True	255	B8	Sample 7	22.25	22.33	3
True	255	B9	Sample 8	22.61
True	255	B10	Sample 9	22.13
True	255	B11	Sample 10	22.08	22.2033	1	ddc
True	255	B12	Sample 11	22.27
True	255	B13	Sample 12	22.26
True	255	B14	Sample 13	22.67	22.71	2
True	255	B15	Sample 14	22.71
True	255	B16	Sample 15	22.75
True	255	B17	Sample 16	22.93	23.0633	3
True	255	B18	Sample 17	23.31
True	255	B19	Sample 18	22.95
True	255	C2	Sample 19	22.69	22.7833	1	main-3
True	255	C3	Sample 20	22.86
True	255	C4	Sample 21	22.8
True	255	C5	Sample 22	22.96	22.5867	2
True	255	C6	Sample 23	22.61
True	255	C7	Sample 24	22.19
True	255	C8	Sample 25	21.89	21.93	3
True	255	C9	Sample 26	22.18
True	255	C10	Sample 27	21.72
True	255	C11	Sample 28	22.3	22.4067	1	ddc main-3
True	255	C12	Sample 29	22.09
True	255	C13	Sample 30	22.83
True	255	C14	Sample 31	22.15	22.5433	2
True	255	C15	Sample 32	22.79
True	255	C16	Sample 33	22.69
True	255	C17	Sample 34	22.91	22.6133	3
True	255	C18	Sample 35	22.2
True	255	C19	Sample 36	22.73
True	255	D2	Sample 37	23.28	23.2133	1	cmt3 main-3
True	255	D3	Sample 38	23.14
True	255	D4	Sample 39	23.22
True	255	D5	Sample 40	22.61	22.7067	2
True	255	D6	Sample 41	23
True	255	D7	Sample 42	22.51
True	255	D8	Sample 43	22.22	22.6	3
True	255	D9	Sample 44	22.98
True	255	D10	Sample 45	23.59
True	255	D11	Sample 46	22.03	22.3067	1	dd main-3
True	255	D12	Sample 47	22.44
True	255	D13	Sample 48	22.45
True	255	D14	Sample 49	23.46	22.66	2
True	255	D15	Sample 50	22.81
True	255	D16	Sample 51	22.51
True	255	D17	Sample 52	23.27	23.385	3
True	255	D18	Sample 53	23.5
True	255	D19	Sample 54	22.2
Experiment: exp3968 Selected Filter: SYBR Green I / HRM Dye (465-510)
Include	Color	Pos	Name	Cp	DRM2	Status							RHIP1	DRM2	∂	∂∂		mean	normalized mean	std dev	normalized std dev		DRM2	normalized mean	normalized std dev
True	255	B2	Sample 1	24.72	24.5867	1	WT				1	WT	23.16	24.5867	1.42667	0	1	0.797697	1	0.193748	0.242884		wt	1	0.242884
True	255	B3	Sample 2	24.61																			ddc	0.000989753	0.000100855
True	255	B4	Sample 3	24.43																			m	0.820438	0.0963386
True	255	B5	Sample 4	24.23	24.3267	2					2		22.6767	24.3267	1.65	0.223333	0.856584						ddcm	0.000632883	0.000152714
True	255	B6	Sample 5	24.13																			cm	0.988555	0.061575
True	255	B7	Sample 6	24.62																			ddm	0.00248641	0.0011616
True	255	B8	Sample 7	25.25	24.655	3					3		22.33	24.655	2.325	0.898333	0.536506
True	255	B9	Sample 8	24.5
True	255	B10	Sample 9	24.81
True	255	B11	Sample 10	33.7	34.145	1	ddc				4	ddc	22.2033	34.145	11.9417	10.515	0.000683392	0.000789523	0.000989753	8.04516e-05	0.000100855
True	255	B12	Sample 11	34.25
True	255	B13	Sample 12	34.04
True	255	B14	Sample 13	34.23	34.29	2					5		22.71	34.29	11.58	10.1533	0.000878096
True	255	B15	Sample 14	34.28
True	255	B16	Sample 15	34.36
True	255	B17	Sample 16	34.53	34.765	3					6		23.0633	34.765	11.7017	10.275	0.00080708
True	255	B18	Sample 17	35
True	255	B19	Sample 18	33.94
True	255	C2	Sample 19	24.93	24.95	1	main-3				7	main-3	22.7833	24.95	2.16667	0.74	0.598739	0.65446	0.820438	0.076849	0.0963386
True	255	C3	Sample 20	24.9
True	255	C4	Sample 21	25.02
True	255	C5	Sample 22	24.49	24.4033	2					8		22.5867	24.4033	1.81667	0.39	0.76313
True	255	C6	Sample 23	24.27
True	255	C7	Sample 24	24.45
True	255	C8	Sample 25	24.12	24.09	3					9		21.93	24.09	2.16	0.733333	0.601513
True	255	C9	Sample 26	23.86
True	255	C10	Sample 27	24.29
True	255	C11	Sample 28	34.04	34.38	1	ddc main-3				10	ddc main-3	22.4067	34.38	11.9733	10.5467	0.000668555	0.000504848	0.000632883	0.00012182	0.000152714
True	255	C12	Sample 29	35.26
True	255	C13	Sample 30	33.84
True	255	C14	Sample 31	35.46	35.345	2					11		22.5433	35.345	12.8017	11.375	0.000376516
True	255	C15	Sample 32	35.23
True	255	C16	Sample 33	34.12
True	255	C17	Sample 34	34.25	35.0967	3					12		22.6133	35.0967	12.4833	11.0567	0.000469474
True	255	C18	Sample 35	35.81
True	255	C19	Sample 36	35.23
True	255	D2	Sample 37	25.13	25.11	1	cmt3 main-3				13	cmt3 main-3	23.2133	25.11	1.89667	0.47	0.721965	0.788567	0.988555	0.0491181	0.061575
True	255	D3	Sample 38	25.09
True	255	D4	Sample 39	24.02
True	255	D5	Sample 40	24.67	24.4467	2					14		22.7067	24.4467	1.74	0.313333	0.80478
True	255	D6	Sample 41	24.21
True	255	D7	Sample 42	24.46
True	255	D8	Sample 43	24.17	24.28	3					15		22.6	24.28	1.68	0.253333	0.838956
True	255	D9	Sample 44	24.22
True	255	D10	Sample 45	24.45
True	255	D11	Sample 46	33.62	33.55	1	dd main-3				16	dd main-3	22.3067	33.55	11.2433	9.81667	0.00110889	0.0019834	0.00248641	0.000926608	0.0011616
True	255	D12	Sample 47	33.48
True	255	D13	Sample 48	32.93
True	255	D14	Sample 49	33.6	33.3967	2					17		22.66	33.3967	10.7367	9.31	0.00157547
True	255	D15	Sample 50	33.08
True	255	D16	Sample 51	33.51
True	255	D17	Sample 52	32.82	33.07	3					18		23.385	33.07	9.685	8.25833	0.00326583
True	255	D18	Sample 53	33.67
True	255	D19	Sample 54	32.72
Include	Color	Pos	Name	Cp	CMT3	Status							RHIP1	CMT3	∂	∂∂		mean	normalized mean	std dev	normalized std dev		CMT3	normalized mean	normalized std dev
True	255	E2	Sample 1	24.98	24.8533	1	WT				1	WT	23.16	24.8533	1.69333	0	1	0.66973	1	0.254509	0.380018		wt	1	0.380018
True	255	E3	Sample 2	24.72																			ddc	0.0264891	0.00478595
True	255	E4	Sample 3	24.86																			m	0.862801	0.191328
True	255	E5	Sample 4	24.96	25.04	2					2		22.6767	25.04	2.36333	0.67	0.628507						ddcm	0.0139732	0.00312109
True	255	E6	Sample 5	24.83																			cm	0.0284532	0.00680883
True	255	E7	Sample 6	25.33																			ddm	0.921473	0.275039
True	255	E8	Sample 7	25.56	25.4167	3					3		22.33	25.4167	3.08667	1.39333	0.380684
True	255	E9	Sample 8	25.49
True	255	E10	Sample 9	25.2
True	255	E11	Sample 10	29.86	30	1	ddc				4	ddc	22.2033	30	7.79667	6.10333	0.014545	0.0177406	0.0264891	0.0032053	0.00478595
True	255	E12	Sample 11	30.05
True	255	E13	Sample 12	30.09
True	255	E14	Sample 13	30.06	30.32	2					5		22.71	30.32	7.61	5.91667	0.0165541
True	255	E15	Sample 14	30.58
True	255	E16	Sample 15	29.76
True	255	E17	Sample 16	30.51	30.255	3					6		23.0633	30.255	7.19167	5.49833	0.0221226
True	255	E18	Sample 17	29.34
True	255	E19	Sample 18	30
True	255	F2	Sample 19	25.02	24.9167	1	main-3				7	main-3	22.7833	24.9167	2.13333	0.44	0.737135	0.577844	0.862801	0.128138	0.191328
True	255	F3	Sample 20	24.72
True	255	F4	Sample 21	25.01
True	255	F5	Sample 22	25.05	25.0833	2					8		22.5867	25.0833	2.49667	0.803333	0.573024
True	255	F6	Sample 23	25.1
True	255	F7	Sample 24	25.1
True	255	F8	Sample 25	24.99	24.8633	3					9		21.93	24.8633	2.93333	1.24	0.423373
True	255	F9	Sample 26	24.63
True	255	F10	Sample 27	24.97
True	255	F11	Sample 28	31.49	31.2933	1	ddc main-3				10	ddc main-3	22.4067	31.2933	8.88667	7.19333	0.00683268	0.00935828	0.0139732	0.00209029	0.00312109
True	255	F12	Sample 29	31.65
True	255	F13	Sample 30	30.74
True	255	F14	Sample 31	31.44	30.9867	2					11		22.5433	30.9867	8.44333	6.75	0.00929068
True	255	F15	Sample 32	30.61
True	255	F16	Sample 33	30.91
True	255	F17	Sample 34	30.23	30.6933	3					12		22.6133	30.6933	8.08	6.38667	0.0119515
True	255	F18	Sample 35	31.17
True	255	F19	Sample 36	30.68
True	255	G2	Sample 37	30.05	30.2133	1	cmt3 main-3				13	cmt3 main-3	23.2133	30.2133	7	5.30667	0.0252659	0.019056	0.0284532	0.00456008	0.00680883
True	255	G3	Sample 38	30.92
True	255	G4	Sample 39	29.67
True	255	G5	Sample 40	30.31	30.5133	2					14		22.7067	30.5133	7.80667	6.11333	0.0144445
True	255	G6	Sample 41	30.33
True	255	G7	Sample 42	30.9
True	255	G8	Sample 43	30.42	30.1333	3					15		22.6	30.1333	7.53333	5.84	0.0174576
True	255	G9	Sample 44	29.88
True	255	G10	Sample 45	30.1
True	255	G11	Sample 46	24.9	25.03	1	dd main-3				16	dd main-3	22.3067	25.03	2.72333	1.03	0.48971	0.617138	0.921473	0.184202	0.275039
True	255	G12	Sample 47	25.19
True	255	G13	Sample 48	25
True	255	G14	Sample 49	25.5	25.4	2					17		22.66	25.4	2.74	1.04667	0.484085
True	255	G15	Sample 50	24.97
True	255	G16	Sample 51	25.73
True	255	G17	Sample 52	24.84	25.2667	3					18		23.385	25.2667	1.88167	0.188333	0.877619
True	255	G18	Sample 53	25.54
True	255	G19	Sample 54	25.42

[truncated: 3 more sheets: S3B fig, S3C fig, S3D fig]
